1 **Active transcription and Orc1 drive chromatin association of the AAA+ ATPase Pch2 during**  
2 **meiotic G2/prophase**

3  
4 Richard Cardoso da Silva<sup>1</sup>, María Ascensión Villar-Fernández<sup>1, 2</sup> and Gerben Vader<sup>1\*</sup>

5  
6 <sup>1</sup> Department of Mechanistic Cell Biology, Max Planck Institute of Molecular Physiology, Otto-Hahn-  
7 Strasse 11, 44227, Dortmund, Germany

8 <sup>2</sup> International Max Planck Research School (IMPRS) in Chemical and Molecular Biology, Max Planck  
9 Institute of Molecular Physiology, Otto-Hahn-Strasse, 11, 44227, Dortmund, Germany

10

11

12 \*To whom correspondence should be addressed: Tel: +49(0)2311332130, Fax: +49(0)2311332128,

13 Email: gerben.vader@mpi-dortmund.mpg.de

14

15

16 ORCID: RCS: 0000-0003-2767-2053

17 GV: 0000-0001-5729-0991

18

19 **Abstract**

20

21 **Pch2 is an AAA+ protein that controls DNA break formation, recombination and checkpoint**  
22 **signaling during meiotic G2/prophase. Chromosomal association of Pch2 is linked to these**  
23 **processes, and several factors influence the association of Pch2 to euchromatin and the specialized**  
24 **chromatin of the ribosomal (r)DNA array of budding yeast. Here, we describe a comprehensive**  
25 **mapping of Pch2 localization across the budding yeast genome during meiotic G2/prophase. Within**  
26 **non-rDNA chromatin, Pch2 associates with a subset of actively RNA Polymerase II (RNAPII)-**  
27 **dependent transcribed genes. Chromatin immunoprecipitation (ChIP)- and microscopy-based**  
28 **analysis reveals that active transcription is required for chromosomal recruitment of Pch2. Similar**  
29 **to what was previously established for association of Pch2 with rDNA chromatin, we find that**  
30 **Orc1, a component of the Origin Recognition Complex (ORC), is required for the association of**  
31 **Pch2 to these euchromatic, transcribed regions, revealing a broad connection between**  
32 **chromosomal association of Pch2 and Orc1/ORC function. Ectopic mitotic expression is insufficient**  
33 **to drive recruitment of Pch2, despite the presence of active transcription and Orc1/ORC in mitotic**  
34 **cells. This suggests meiosis-specific ‘licensing’ of Pch2 recruitment to sites of transcription, and**  
35 **accordingly, we find that the synaptonemal complex (SC) component Zip1 is required for the**  
36 **recruitment of Pch2 to transcription-associated binding regions. Interestingly, Pch2 binding**  
37 **patterns are distinct from meiotic axis enrichment sites (as defined by Red1, Hop1 and Rec8). This**  
38 **suggests that although Pch2 is linked to axis/SC-directed recruitment and function, the**  
39 **chromosomal population of Pch2 described here is not directly associated with chromosomal axis**  
40 **sites. In line with this observation, interfering with the pool of Pch2 that associates with active**  
41 **RNAPII transcription does not lead to effects on the chromosomal abundance of Hop1, a known**  
42 **axial client of Pch2. We thus report characteristics and dependencies for Pch2 recruitment to**  
43 **meiotic chromosomes, and reveal an unexpected link between Pch2, SC formation, chromatin and**  
44 **active transcription.**

45

## 46 **Introduction**

47 Meiosis is a specialized developmental program dedicated to the production of genetically unique  
48 haploid gametes [1]. The production of haploid gametes is made possible by several meiosis-specific  
49 events, chief among them the event of homologous chromosome segregation during the first meiotic  
50 chromosome segregation event (*i.e.* meiosis I). Faithful segregation of homologs requires that initially  
51 unconnected homologous chromosomes are physically linked prior to segregation. Homolog linkage is  
52 achieved by interhomologue-directed crossover repair of programmed DNA double strand breaks (DSBs)  
53 prior to meiosis I (*i.e.* during meiotic G2/prophase). DSBs are introduced by Spo11, a topoisomerase-like  
54 protein, which acts in conjunction with several accessory factors [2]. DSB formation happens in the  
55 context of a specialized, meiosis-specific chromosome architecture [3] [4]. Several protein factors (such  
56 as Red1 and Hop1 in budding yeast [5] [6]) drive the assembly of chromosomes into linear arrays of  
57 chromatin loops that emanate from a proteinaceous structure termed the meiotic chromosome axis. Red1  
58 and Hop1 co-localize with the meiotic cohesin complex (containing the meiosis-specific Rec8 kleisin  
59 subunit instead of the canonical Scc1) to form the molecular foundation of this typical meiotic ‘axis-loop’  
60 chromosome structure [7, 8]. A zipper-like assembly called the synaptonemal complex (SC) polymerizes  
61 between synapsing homologous chromosomes [9], concomitantly with, and dependent on ongoing  
62 crossover repair of meiotic DSBs [10, 11]. In budding yeast, the Zip1 protein is the main component of  
63 the SC, which is assembled onto the axial components of the loop-axis architecture [12, 13]. The SC  
64 likely acts as a signaling conduit that coordinates DSB activity and repair template preferences with  
65 chromosome synapsis [14-16]. A major role for the SC lies in directing the chromosomal recruitment of  
66 the hexameric AAA+ enzyme Pch2 [14, 17, 18], an important mediator of DSB activity, repair, and  
67 checkpoint function (reviewed in [19]). The molecular mechanisms of Pch2 recruitment to synapsed  
68 chromosomes remain poorly understood. In *zip1Δ* cells, Pch2 cannot be recruited to meiotic  
69 chromosomes (except to the nucleolus/rDNA; see below) [17]. However, this is unlikely via a direct  
70 molecular interaction. First, a specific Zip1-mutant (*zip1-4LA*) uncouples SC formation from Pch2  
71 recruitment [14, 20]. Second, in cells lacking the histone H3 methyltransferase Dot1, Pch2 can be  
72 recruited to unsynapsed chromosomes in *zip1Δ* cells [21, 22]. Third, a recent report has linked  
73 topoisomerase II (Top2) function to Pch2 association with synapsed chromosomes [23], hinting at a  
74 connection between chromosome topology and Pch2 recruitment.

75 Functionally, a main role for Pch2 on synapsed chromosome has been identified in modulating the  
76 abundance of Hop1 on chromosomes [14, 17, 24]. Pch2 recruitment to SC-forming chromosomal regions  
77 allows it to use its ATPase activity to dislodge Hop1 from synapsed regions [25-27], causing a coupling  
78 of SC formation to a reduction in DSB activity, interhomologue repair bias and checkpoint function [14,  
79 19]. In addition to its recruitment to euchromatic regions, Pch2 is recruited to the nucleolus, where it is  
80 involved in protecting specific regions of the ribosomal (r)DNA array (and rDNA-flanking euchromatic  
81 regions) against Spo11-directed DSB activity [17, 28]. The nucleolus is devoid of SC polymerization (and

82 thus of Zip1), and nucleolar recruitment of Pch2 is dependent on Sir2 (a histone deacetylase) and Orc1 (a  
83 component of the Origin Recognition Complex (ORC)) [17, 28]. Strikingly, with the exception of Zip1,  
84 all factors that direct Pch2 recruitment (whether within the rDNA, or within euchromatin) are involved in  
85 chromatin function, be it modification (Dot1 and Sir2), binding (Orc1, via its bromo-adjacent homology  
86 (BAH) domain) or metabolism (Topoisomerase II). Together, these observations predict an intimate  
87 interplay between chromatin and Pch2 binding. Inspired by this, and with the aim of increasing our  
88 understanding of Pch2 function on meiotic chromosomes, we generated a comprehensive map of Pch2  
89 chromosomal association during meiotic G2/prophase. This analysis revealed specific binding sites of  
90 Pch2 across the genome. Within euchromatin, these sites map to regions of RNA Polymerase II  
91 (RNAPII)-driven transcriptional activity (*i.e.* a subset of active genes), and recruitment of Pch2 depended  
92 on active RNAPII-driven transcription. Orc1 (and also other ORC subunits) are enriched at Pch2 binding  
93 sites, whereas no Pch2 can be found associated with origins of replication, which are the canonical  
94 binding sites of ORC [29]. Intriguingly, Orc1 inactivation triggers loss of Pch2 binding at active genes,  
95 demonstrating a connection between Pch2 and Orc1 that extends beyond their previously described  
96 shared rDNA-associated functions [28]. Although active transcription and Orc1 are equally present in  
97 meiotic and mitotic cells, we further show that ectopic expression of Pch2 in vegetatively growing cells is  
98 not sufficient to allow recruitment of Pch2 to the identified binding sites within actively transcribed  
99 genes. This suggests meiosis-specific requirements that license Pch2 recruitment. In agreement with this,  
100 we find that Zip1 is required for the recruitment of Pch2 to the identified transcription-associated binding  
101 regions.

102 Interestingly, the Pch2 binding patterns identified here are distinct from meiotic axis enrichment sites (as  
103 defined by Red1, Hop1 and Rec8). Thus, although Pch2 has been associated with axis/SC-directed  
104 recruitment and function, the chromosomal population of Pch2 identified here is likely not directly  
105 associated with chromosomal axis sites. In line with this observation, we find that interfering with the  
106 pool of Pch2 that associates with active RNAPII transcription does not lead to effects on the  
107 chromosomal association of Hop1. We thus uncover characteristics and dependencies for Pch2  
108 recruitment to meiotic chromosomes, and reveal an unexpected link between Pch2, SC formation,  
109 chromatin and active transcription.

## 110 **Material and Methods**

111

### 112 **Yeast strains and growth conditions**

113 All yeast strain used in this study were of the SK1 strain background, except for the strains  
114 harboring the galactose-inducible promoter (*pGAL10*) system which are of the W303 background. The  
115 genotypes of these strains are listed in Supplementary Data. Induction of synchronous meiosis was  
116 performed as described in [28]. For experiments using mitotically cycling cells (as shown in Figure 5A-  
117 D), cells were grown to saturation in YP-D/R medium ((1% (w/v) yeast extract, 2%(w/v) peptone,  
118 0,1%(w/v) dextrose and 2%(w/v) raffinose)) at 30°C. Cultures were diluted to an optical density at  
119 600nm (OD600) of 0.4, grown for an additional 4 hours after which 2% galactose was added. Unless  
120 stated otherwise, samples of cells undergoing synchronous meiosis were collected 4 hours after  
121 incubation in sporulation (SPO) medium. Synchronous entry of cultures into the meiotic program was  
122 confirmed by flow cytometry-based DNA content analysis (see below). For experiments using  
123 temperature sensitive strains, meiotic induction was performed as described in [28], except that cells were  
124 grown for up to 24 hours in pre-sporulation medium (BYTA) at the permissive temperature (23°C).  
125 Meiotic cultures were kept at 23°C (for *orc1-161* strains) or shifted to 30°C (for *orc2-1* strains). For the  
126 inhibition of global transcription (Supplementary Figure 3) 1,10- Phenanthroline (100 µg/mL in 20%  
127 ethanol, Sigma-Aldrich) [30] was added to cultures 3 hours after induction into the meiotic program.  
128 Cells were subsequently grown for one hour, and harvested. For mitotic expression of Pch2-E399Q, the  
129 coding sequence of *pch2-E399Q* (lacking its intron) was cloned in a *URA3* integrative plasmid containing  
130 *pGAL10-3XHA*. The plasmid was integrated at the *URA3* locus. For expression of 3XFLAG-dCas9 in  
131 meiosis, *3XFLAG-dCas9-tCYC1* was cloned in a TRP1 integrative plasmid containing *pHOPI* to create  
132 *pHOPI-3XFLAG-dCas9-tCYC1*. The plasmid containing *3XFLAG-dCas9/pTEF1p-tCYC1* was a gift from  
133 Hodaka Fujii and obtained via Addgene.org (Addgene plasmid #62190) [31].

134

### 135 **Nuclear depletion via the anchor-away method**

136 Rpo21 was functionally depleted from the nucleus using the anchor away technique [32, 33].  
137 Briefly, Rpo21 was tagged with FKBP12-rapamycin-binding (FRB), and this allele was introduced in  
138 strains harboring the anchor away background (*RPL13A-2xFKBP12 fpr1Δ tor1-1*) [32]. Nuclear depletion  
139 of Rpo21-FRB was achieved by addition of rapamycin at a concentration of 1 µM. Exact treatment  
140 regimens are indicated per experiment (see figure legends). For viability assays, serial dilutions of  
141 mitotically growing yeast cells were spotted on solid YPD containing 1 µM rapamycin for 2 days.

142

### 143 **Co-immunoprecipitation and western blots**

144 100mL of SPO cultures (OD600 1.9), were harvested at 3000 rpm for 3 min at 4°C and washed  
145 once with ice-cold Tris-buffered saline (TBS) buffer (25 mM Tris-HCl, pH 7.4, 137 mM NaCl, 2.7 mM

146 KCl). Cells were snap-frozen in liquid nitrogen and stored at -80°C until further use. Cells were  
147 resuspended in lysis buffer (50mM Tris-HCl pH 7.4, 150mM NaCl, 1% Triton X-100, and 1mM EDTA)  
148 containing protease inhibitors and broken with glass beads using bead beater (FastPrep-24, MP  
149 Biomedicals; 2 X 60 seconds at speed 6.0, incubated on ice in between for 5 min). Chromatin was sheared  
150 by sonication using a Bioruptor (Diagenode), 25 cycles of 30 seconds on/off, high power at 4°C. Lysates  
151 were clarified by centrifugation for 15 min at 16,000 x g at 4°C. Lysates were then immunoprecipitated  
152 with  $\alpha$ -TAP antibodies using magnetic beads (Invitrogen), washed 4 times with buffer containing  
153 detergent and another time with the same buffer without detergent. Beads were eluted in 1X Loading  
154 buffer (50 mM Tris-HCl pH 6.8, 2% SDS, 10% glycerol, 1%  $\beta$ -mercaptoethanol, 12.5 mM EDTA, 0.02  
155 % bromophenol blue) and the supernatant resolved by SDS-PAGE followed by Western blot. Protein  
156 extracts were prepared by using trichloroacetic acid (TCA) extraction protocol as previously described  
157 [28]. Samples were resolved by SDS-PAGE, transferred to nitrocellulose membranes and probed with the  
158 following primary antibodies diluted in 5% (w/v) nonfat-milk in TBS buffer + 0.1% Tween 20:  $\alpha$ -Flag  
159 (Sigma-Aldrich, F3165),  $\alpha$ -ORC2 (Abcam, 664906),  $\alpha$ -HA (BioLegend, 901502),  $\alpha$ -TAP (Thermo  
160 Scientific, CAB1001),  $\alpha$ -Pgl1 (Invitrogen, 459250),  $\alpha$ -Rpo21 (BioLegend, 664906),  $\alpha$ -phosphoserine 5  
161 Rpo21 (Thermo Scientific, MA518089),  $\alpha$ -Histone-H3 (Abcam, AB1791),  $\alpha$ -FRB (Enzo, ALX215-065-  
162 1),  $\alpha$ -Zip1 (Santa Cruz Biotechnology, YC-19),  $\alpha$ -Hop1 (kind gift of Nancy Hollingsworth, Stony Brook  
163 University, Stony Brook, USA),  $\alpha$ - $\beta$ -Actin (Abcam, AB170325),  $\alpha$ -Histone H2A (Active Motif,  
164 AB2687477) or  $\alpha$ -ORC (kind gift of Stephen Bell, MIT, Cambridge, USA). Membranes were incubated  
165 with horseradish peroxidase-conjugated goat anti-rabbit IgG, anti-mouse IgG and donkey anti-goat IgG  
166 (Santa Cruz Biotechnology). Proteins were detected with ECL (GE Healthcare) using a digital imaging  
167 system Image-Lab (Bio-Rad).

168

### 169 **Chromatin Immunoprecipitation (ChIP)**

170 For ChIP experiments 100 mL SPO-cultures (OD600 1.9) were harvested 4 hours after entering  
171 meiosis, unless stated otherwise. Meiotic cultures or exponentially growing mitotic cultures were  
172 crosslinked with 1% methanol-free formaldehyde for 15 minutes at room temperature and the reaction  
173 was quenched with 125 mM Glycine. Cells were washed with ice-cold TBS, snap-frozen and stored at -  
174 80°C. Cells were resuspended and broken with glass beads using a bead beater, as described above.  
175 Chromatin was sheared using either a Branson Sonifier 450 (microtip, power setting 2, 100% duty cycle,  
176 3X for 15sec, 2 min on ice in between) or using a Diagenode Bioruptor UCD 200 (25 cycles of 30  
177 seconds on/off, high power at 4°C). Cells were centrifuged at 13000 rpm for 10 min at 4°C. 10% of  
178 sample was removed for input. 550  $\mu$ l of cell lysates were pre-incubated with the following antibodies for  
179 3 hours at 4°C prior to overnight incubation under rotation with magnetic Dynabeads-protein-G  
180 (Invitrogen): for ORC ChIP, 1  $\mu$ l of  $\alpha$ -ORC and 1  $\mu$ l of isotype control antibody ( $\alpha$ -rabbit IgG (Bethyl,



181 P120-101). For TAP ChIP, 1  $\mu$ l of  $\alpha$ -TAP, and for HA ChIP, 1  $\mu$ l of anti-HA. For RNA Pol-II ChIP, 1  $\mu$ l  
182 of  $\alpha$ -Rp021 or  $\alpha$ -phosphoserine 5 Rpo21. Immunoprecipitates were incubated and washed as described  
183 above. For FLAG ChIP cells lysates were incubated with 30 $\mu$ l of 50%  $\alpha$ -Flag-M2 affinity gel (Sigma-  
184 Aldrich, A2220) for 3 hours. Bound proteins were eluted using a 3XFLAG peptide (Sigma-Aldrich,  
185 F4799) as described in [34]. Subsequent steps (*i.e.* reversal of crosslinking, Proteinase-K and RNase-A  
186 treatments and final purifications and elutions) were performed as previously described in [35].

187

### 188 **ChIP-Seq library preparation**

189 Preparation of paired-end sequencing libraries was performed using the Illumina TruSeq ChIP  
190 library preparation kit, according to the manufacturer's guidelines. Ligation products were size-selected  
191 (250-300 bp) and purified from a 2% low-melting agarose gel using the MinElute Gel Extraction Kit  
192 (Qiagen). Ampure XP beads (Agilent) were used for cleanup steps and size selection. The final purified  
193 product was quantitated using Picogreen in a QuantiFluor dsDNA System (Promega). Sequencing was  
194 performed on the Illumina NextSeq 500 platform at the Max Planck Genome Centre Cologne, Germany.

195

### 196 **Processing of ChIP seq data**

197 Preliminary quality control of raw reads was performed with FastQC. Illumina raw sequences  
198 were then filtered for removal of low quality and duplicated reads, adapters and low-quality bases using  
199 the SAM tools. Paired-sequencing reads from three biological independent replicas (ChIPed DNA and  
200 their respective inputs from 3XFLAG-Pch2 and 3XFLAG-tagged-Pch2-*E399Q* expressing cells) were  
201 aligned and mapped to the S288C (SacCer3) genome assembly with CLC Genomics Workbench 10,  
202 allowing for maximal 2 mismatches in 100bp. Duplicated reads were removed. The resulted mappings  
203 were then used as input for peak calling. The peaks shown were obtained through normalization with  
204 inputs. In order to obtain high-quality peaks, a p-value of 1e-15 was used for calling the peaks. Peak  
205 calling was performed with CLC-genomics. The CLC peak caller is based on a Gaussian filter that  
206 derives the mean variance from cross-correlations obtained from the ChIP-seq data and its respective  
207 input control, thus avoiding detection of peaks from regions with strong sequencing biases or potential  
208 PCR artefacts originated during library preparation [36]. Bowtie reading maps was also used as input for  
209 peak calling and resulted in similar peak profiles. All peaks were manually verified prior to analysis  
210 aiming to exclude those which were not present in at least two of the three technical replicates. For RNA-  
211 seq data analyses shown in Supplementary Figure 1C and D, reads obtained from (GSE131994, 3 hours in  
212 meiosis) [23], were mapped to the SK1 genome background (SGRP) and analyzed using the RNA-seq  
213 platform on CLC-genomic workbench. For analysis shown in figure Supplementary Figure 2A, peak  
214 calling was performed by subtracting NLS-GFP ChIP-seq data (SRR2029413) [37] from the Pch2 ChIP-  
215 seq dataset. Hop1 (GSM1695721 and GSM165720), Red1 (GSM1695718 and GSM1695716) and Rec8  
216 (GSM1695724 and GSM1695722) ChIP-seq datasets were from [8]. For Supplementary Figure 6F, Hop1

217 ChIP-seq datasets (wild type; GSM2818425 and GSM2818423, *pch2Δ*; GSM2818432 and GSM2818436)  
218 were used from [38].

219

## 220 **Computational analyses**

221 Log<sub>2</sub> ratios (IP/Input) of the genome-wide enrichment of ChIP-seq (3XFLAG-Pch2 and  
222 3XFLAG-tagged-Pch2-*E399Q*) was generated by MACs peak calling using the Read Count Quantitation  
223 algorithm of Seqmonk (version 0.34.1). To generate distance maps, Open ReadinG Frames (ORFs) and  
224 tRNAs, (gene annotations and chromosomal coordinates were obtained from SGD  
225 (<http://www.yeastgenome.org>)) and Autonomously Replicating Sequences (ARSs) (coordinates and  
226 sequences for the 798 (confirmed, likely, and dubious) origins were downloaded from the OriDB (version  
227 2012 (<http://www.oridb.org>)) were transformed into BED files using the table browser tool (USCS) [39].  
228 Intensity was parsed into 100 base pair bins and Pch2 binding sites were aligned at the center of ORFs,  
229 tRNAs and ARSs. Venn diagrams were generated using the web-based Venn diagram generator from  
230 <http://jura.wi.mit.edu/bioc/tools/venn.php>. Pearson correlation was performed with datasets from the  
231 CLC-genomics peak shape score for each Pch2 binding gene and their specific expression values obtained  
232 from analysis of RNA-seq data [23] (Supplementary Figure 1D). To determine whether the Pch2 binding  
233 genes were enriched in certain functional categories, gene ontology analysis was conducted using the  
234 SGD GO term finder (molecular function) (<https://www.yeastgenome.org/goTermFinder>) at a p-value  
235 cutoff of 0,01.

236

## 237 **ChIP-qPCR**

238 ChIP and Input samples were quantified by qPCR on a 7500 FAST Real Time PCR machine  
239 (Applied Biosystems). The percentage of ChIP relative to input was calculated for the target loci as well  
240 as for the negative controls. Enrichment [relative to time untagged control or IgG (control)] was  
241 calculated using the  $\Delta C_t$  method as follows:  $1/(2^{[C_t - C_{tcontrol}]})$ . Primers sequences (including primer  
242 efficiency) covering the various loci are listed in the Supplementary Data.

243

## 244 **RNA extraction and RT-qPCR**

245 For RNA extraction, 15 mL meiotic cultures were harvested and total RNA was extracted using  
246 the hot-acidic phenol method [40], with some minor modifications. Cells were resuspended in 600  $\mu$ l of  
247 freshly prepared TES buffer (10 mM Tris-Cl, pH 7.5 10 mM EDTA 0.5% SDS). 600  $\mu$ l of acidic-phenol  
248 (Ambion) was added and the solution was immediately vortexed vigorously for 30 seconds. Samples were  
249 incubated at 65°C for 90 min under rotation at 300 rpm. The solution was kept on ice for 10 minutes and  
250 spinned down at 14000 rpm for 10 minutes at 4°C. The aqueous top layer was transferred to a new tube  
251 and 600  $\mu$ l of chlorophorm was added and immediately vortexed. Cells were centrifuged as above after  
252 which the aqueous layer was transferred to a new pre-chilled eppendorf tube. RNA was precipitated



253 overnight at -20°C with 2.5 volumes of 100% ethanol and 10% (v/v) sodium acetate, pH 5.4 and washed  
254 with 75% ethanol. After drying on ice, RNA was eluted with RNase free water and stored at -80°C.  
255 cDNA was generated using the superscript-III reverse transcriptase (Invitrogen) according to the  
256 manufacturer's protocol. Briefly, 1-2 µg of total RNA was used in a 20 µl reaction mixture using random  
257 primer mix or oligodT-20 (Invitrogen). Relative amounts of cDNAs of various genes were measured by  
258 real time quantitative PCR (RT-qPCR). Expression of every gene was normalized to expression of *18S*  
259 (RNA Pol I transcript) or  $\beta$ -Actin (*ACT1*) from the same RNA preparation. Oligo sequences are available  
260 in Supplementary Data.

261

## 262 **Chromosome spreads and immunofluorescence**

263 Chromosome spreading was performed as described in [14]. For immune staining, the following  
264 antibodies were used:  $\alpha$ -HA (Roche, 11867423001),  $\alpha$ -Zip1 (Santa Cruz Biotechnology, YN-16),  $\alpha$ -  
265 Gmc2 (a kind gift of Amy MacQueen, Wesleyan University, Middletown, CT, USA),  $\alpha$ -Rp021 and  $\alpha$ -  
266 Hop1 (home made).  $\alpha$ -Hop1 were raised against full length 6-His-tagged Hop1 expressed in bacteria.  
267 Hop1 was purified via affinity purification followed by ion-exchange chromatography, and used for  
268 immunization. Antibody production was performed at the antibody facility of the Max Planck Institute of  
269 Molecular Cell Biology and Genetics (Dresden, Germany). DNA was stained with 4',6-Diamidine-2'-  
270 phenylindole dihydrochloride (DAPI). Images were obtained using a DeltaVision imaging system (GE  
271 Healthcare) using a sCMOS camera (PCO Edge 5.5) and 100x 1.42NA Plan Apo N UIS2 objective  
272 (Olympus). Deconvolved images (SoftWoRx software 6.1.1 and/or z-projected) using the SoftWoRx  
273 software 6.1.1). were quantitated using Imaris Software (Oxford Instruments).

274

## 275 Results

276 We aimed to generate a detailed genome-wide mapping of the chromosomal localization pattern of  
277 Pch2, using chromatin immunoprecipitation followed by deep sequencing (ChIP-seq). For this, we  
278 employed a NH<sub>2</sub>-terminal 3xFLAG-tagged wild type version of Pch2, and a mutant allele harboring an  
279 E>Q substitution at position 399 within the AAA+ Walker-B motif (*pch2-E399Q*) (Figure 1A). This  
280 mutant is expected to cause impaired ATP hydrolysis, and equivalent mutations have been used to  
281 stabilize interactions between AAA+ proteins and clients and/or adaptors [41]. We anticipated that Pch2-  
282 E399Q would exhibit increased association to chromosomal regions as compared to its wild type  
283 counterpart, which could aid in revealing details regarding Pch2 recruitment and/or function. Strains  
284 expressing wild type Pch2 and Pch2-E399Q (Figure 1B) were used to generate ChIP-seq datasets during  
285 meiotic G<sub>2</sub>/prophase. We compared independent ChIP-seq datasets for wild-type and *E399Q* Pch2  
286 (performed in triplicates in both cases) and found that these datasets exhibited highly correlated  
287 distributions, both at a genome-wide level and at individual loci. Distribution patterns were highly  
288 reproducible among replicas, and we averaged maps from three independent experiments for Pch2 wild-  
289 type and E399Q for further analyses. In addition, for several follow-up experiments (see below), we used  
290 both alleles (*i.e.* wild type and E399Q) interchangeably. Our genome-wide ChIP analyses revealed that  
291 Pch2 is recruited to distinct regions on all 16 budding yeast chromosomes (Supplementary Table 1). The  
292 use of a peak-calling algorithm with a stringent threshold [36] revealed that the vast majority (*i.e.* ~97 %;  
293 for wild type Pch2 434 out of 447 peaks, for Pch2-E399Q 525 out of 540 total peaks) of the identified  
294 peaks (p-value: 1e-15, see material and methods) localized within the coding sequences (CDS) of a subset  
295 of RNAPII-transcribed genes (see Figure 1C and 1D for typical examples of binding patterns,  
296 Supplementary Figure 1A). ~3% of peaks represent binding sites with relatively low peak shape scores at  
297 centromeres and some telomeric regions. We did not observe Pch2-association within promoters (*i.e.*  
298 directly upstream of the transcriptional start sites (TSSs)) of these Pch2-bound genes. Pch2 peaks were  
299 evenly distributed throughout CDSs and located downstream of TSSs, showing symmetrical ChIP  
300 patterns that are reminiscent of ChIP signals for transcriptionally-engaged RNAPII (Figure 1E). We  
301 plotted the average global difference between Pch2 wild-type and Pch2 *E399Q* for the 434 common  
302 peaks. Association of Pch2 *E399Q* to the common binding sites (434 peaks) is stronger relative to wild-  
303 type Pch2, as judged by the differences in peak shape score (Supplementary Figure 1B). In general,  
304 individual Pch2 *E399Q* peaks had either similar or higher peak shape scores in comparison to wild-type  
305 Pch2. Based on the biochemical characteristics of AAA+ enzymes, the Pch2-E399Q is expected to exhibit  
306 stronger binding to clients and/or adaptors [41], and these increased binding patterns thus suggest that the  
307 observed binding sites represent biochemically meaningful interactions. In addition to the observed  
308 association of Pch2 with RNAPII-transcribed genes, we also found evidence for specific Pch2-binding  
309 patterns within the rDNA array (RCS and GV, unpublished observations). These binding patterns might  
310 relate to the observed enrichment of Pch2 within the nucleolus [17, 28]. Here, we focus on the Pch2

311 binding patterns across the non-rDNA, euchromatic part of the genome. We queried sequences of the 434  
312 genes for motifs using MEME motif-finding software (Bayley et al, 2009), but this did not identify motifs  
313 with any degree of significance (data not shown), suggesting that recruitment of Pch2 is not directly  
314 connected with any obvious DNA sequence-directed factors. We next performed a search for enriched  
315 Gene Ontology (GO) terms showing a representation for genes involved in various metabolic processes  
316 (Supplementary Table S2). In addition to these GO terms, Pch2-association was also enriched within  
317 sporulation-induced (*i.e.* meiosis-specific) genes. Analysis of genome-wide transcriptome (*i.e.* total RNA-  
318 seq) datasets from cells that synchronously progress through meiosis [23] showed that all of the genes  
319 occupied by Pch2 are transcribed during meiosis, suggesting that transcription is involved in the  
320 recruitment of Pch2 to these CDSs. To test if transcriptional “strength” of defined genes was predictive of  
321 Pch2 binding, we stratified the transcribed genes from the RNA-seq dataset into high, medium and low  
322 expression strength (following previously established procedures [42]), and compared expression strength  
323 of Pch2-associated genes with these bins (Supplementary Figure 1C). This analysis showed that Pch2-  
324 associated genes produce average mRNA levels, with a wide distribution. We detected a weak correlation  
325 between the peak shape score of individual Pch2-binding sites and the expression level of the  
326 corresponding CDS (Pearson’s test,  $R^2=0.0026$ , Supplementary Figure 1D). This indicates that, although  
327 Pch2 associates with actively transcribed genes, expression strength is not a determining factor for Pch2  
328 binding. Underscoring this interpretation is the fact that many highly expressed genes do not show  
329 significant Pch2 enrichment peaks. ChIP analysis can be plagued by artefactual ChIP-enrichments, some  
330 of which have been observed within highly-expressed, RNAPII-transcribed genes and within non-coding,  
331 but equally highly-expressed RNAPIII-transcribed tRNAs (these regions are often referred to as  
332 hyperChIPable regions [37]). We performed several analysis and experiments to exclude artefactual  
333 binding effects in our ChIP datasets, and we discuss these in the Supplementary Results (see also  
334 Supplementary Figure 2). Based on these experiments and on additional experiments that are described  
335 below, we are confident that our Pch2 datasets inform on physiologically relevant biological behavior.  
336 To further explore the information gathered by our ChIP-seq results, we employed ChIP followed by real-  
337 time quantitative PCR (ChIP-qPCR). We designed oligo’s flanking regions spanning three different  
338 portions of a selected Pch2 binding gene, *GAP1*. *PPR1*, an RNAPII-transcribed gene to which Pch2  
339 showed no association by ChIP-seq, was used as a negative control. 3xFLAG-Pch2-*E399Q* associated to  
340 the three regions spanning the *GAP1* gene body to similar extents (Figure 1F), whereas no significant  
341 association was observed at the *PPR1* locus (Supplementary Figure 1E). We confirmed transcriptional  
342 activity at *GAP1* and *PPR1* by ChIP analysis of active RNAPII (as judged by ChIP-qPCR analysis of  
343 phosphorylated C-terminus domain of Rpo21 ( $\alpha$ -PolII-Ser5-P ChIP) (Supplementary Figure 1F). The C-  
344 terminal domain (CTD) of Rpo21 harbors a series of YSPTSPS heptad repeats that are  
345 hyperphosphorylated during transcription (reviewed in [43]). Phosphorylation of Rpo21-Serine 5 can be  
346 used as a read-out to assess active engagement of RNAPII during transcription elongation. We note that

347 *GAPI*, a gene highly expressed both in exponentially cycling cells and during meiosis was also identified  
348 as a site of hyperChIPpability (*i.e.* it is one of the 19 genes that shows overlap between our Pch2 datasets  
349 and the NLS-GFP dataset). Importantly, in agreement with the results obtained by ChIP-seq, we  
350 confirmed the association of wild-type Pch2 and Pch2-E399Q to three additional binding genes tested  
351 (*HOP1*, *TDH3* and *SSA1*), none of which were present in the hyperChIPable dataset (Figure 1G and H).  
352 Based on this (and on several additional lines of evidence; see Supplementary results and discussion), we  
353 are confident that Pch2 enrichment at *GAPI* represents a true enrichment (and that *GAPI* can be used to  
354 further investigate the biology behind Pch2 recruitment). Using ChIP-qPCR we confirmed increased  
355 binding of Pch2-E399Q as compared to wild-type Pch2 (Figure 1G and H). In addition to its catalytic  
356 AAA+ domain, Pch2 also possess a non-catalytic NH2-terminal domain (NTD) (Figure 1A) [19]. The  
357 NTDs of AAA+ ATPases are required to allow AAA+ proteins to interact with clients and adaptors [19,  
358 41]. Removal of the NTD of Pch2 abrogated the association of Pch2 to individual selected genes,  
359 indicating that the NTD is required for recruitment of Pch2 to gene bodies (Figure 1G and H). In total, we  
360 conclude that during meiotic G2/prophase, Pch2 associates within the body of a selected group of  
361 RNAPII-associated genes, and that recruitment depends on specific characteristics of AAA+ proteins.  
362 We next wanted to establish whether global inhibition of RNAPII transcription affected Pch2 occupancy.  
363 To inhibit RNAPII-dependent transcription, we initially used 1,10-Phenanthroline – a small molecule that  
364 most likely acts as a magnesium chelator –, which has previously been described to inhibit RNAPII-  
365 dependent transcription [30]. Meiotic yeast cultures expressing 3XFLAG-Pch2 E399Q were treated with  
366 1,10-Phenanthroline for 1 hour. Under these conditions, we observed a substantial effect on *GAPI* mRNA  
367 levels, in cells treated with 1,10-Phenanthroline, whereas Pch2 protein levels were not affected  
368 (Supplementary Figure 3A-C). Inhibition of global transcription reduced Pch2 association to *GAPI* gene  
369 by ~50% compared to mock control (Supplementary Figure 3D), consistent with a role for transcription in  
370 promoting the recruitment/association of Pch2 to regions of active transcription. To achieve a more  
371 complete and specific inhibition of RNAPII, we employed the anchor-away technique [32], which has  
372 been used to successfully deplete chromosomal proteins during meiosis [14, 23, 38, 44]. This technique is  
373 based on an inducible dimerization system that rapidly depletes nuclear proteins based on ribosomal flux,  
374 with the aid of a tagged anchor-protein, Rpl13A (Rpl13a-2XFKBP12). Rapamycin induces the formation  
375 of a ternary complex with a protein of interest that is tagged with FRB (FKBP12-Rapamycin Binding-  
376 FRB domain of human mTOR) (Figure 2A). Successful inhibition of RNAPII using the same genetic  
377 approach has been described in vegetative cells [33], and we tagged the largest subunit of RNAPII  
378 (Rpo21) with the FRB tag (Supplementary Figure 3E). As expected, *rpo21-FRB* cells exhibited severe  
379 growth defects in the presence of rapamycin (Figure 2B). Immunofluorescence of Rpo21 on meiotic  
380 chromosome spreads after exposure with Rapamycin for 30 minutes demonstrated efficient nuclear  
381 depletion of Rpo21-FRB during meiosis (Figure 2C and D). We additionally performed ChIP-qPCR  
382 analysis, using antibodies against phosphorylated-Serine 5 of Rpo21 in meiotic cells following addition of

383 rapamycin or DMSO. Our ChIP shows that the relative occupancy of RNAPII within *PPRI* and *GAPI*  
384 coding regions was substantially reduced after 30 minutes rapamycin treatment in cells expressing  
385 Rpo21-FRB (Figure 2E), further demonstrating that RNAPII is depleted from the nucleus under this  
386 treatment regimen. Importantly, ChIP analysis revealed that Pch2 binding was significantly reduced in  
387 Rpo21-FRB-tagged strains treated with rapamycin for 30 minutes (Figure 2F), whereas the protein levels  
388 of Pch2 were unaffected (Figure 2G). We conclude that active transcription is required to promote the  
389 recruitment/association of Pch2 to a defined subset of transcriptionally active genes. We next addressed  
390 whether a reduction of Pch2 binding to these regions upon transcriptional inhibition could be  
391 corroborated through independent, cytological methods. For this, we performed immunofluorescence on  
392 spread chromosomes to quantify the chromosomal association of Pch2 during meiotic G2/prophase, and  
393 found that a brief inhibition (*i.e.* 30 minutes) of active transcription (via Rpo21-FRB nuclear depletion)  
394 triggered a significant reduction of Pch2 chromosome-associated foci within synapsed chromosome  
395 regions (as identified by staining with the SC component Gcm2 [45]) (Figure 2H and I). We note that the  
396 loss of Pch2 from synapsed chromosomes under these conditions is partial, which is in contrast to the  
397 complete loss of Pch2 from chromosomes that is seen in *zip1* $\Delta$  cells [17]. This difference might indicate  
398 an incomplete inhibition of transcription-dependent recruitment under the used conditions. Alternatively,  
399 it could suggest the presence of additional chromosome-associated pools of Pch2, that are recruited  
400 independently of transcription. Importantly, the nucleolar pool of Pch2 (identified by typical structure and  
401 lack of association with SC structures) appeared unaffected by RNAPII inhibition, suggesting that  
402 nucleolar recruitment does not depend on RNAPII-dependent transcription (Figure 2H). Together, these  
403 data identify active RNAPII-dependent transcription as a factor that contributes to the recruitment of Pch2  
404 to euchromatic chromosome regions during meiotic G2/prophase.

405 We aimed to better understand the recruitment of Pch2 to chromosomes and its connection with  
406 transcription. For this, we focused on Orc1, a factor involved in Pch2 recruitment to the nucleolus [28,  
407 46]. Orc1 is a component of the Origin Recognition Complex (ORC), a six subunit (Orc1-6) hexameric  
408 AAA+ ATPase (Figure 3A), and we recently showed that Pch2 directly interacts with ORC [47]. The first  
409 step in DNA replication occurs when the ORC recognizes and directly binds hundreds of origins of  
410 replication (also known as autonomously replicating sequences (ARSs)) across the genome (reviewed in  
411 [29]). Given the direct interaction between ORC and Pch2 and the well-established association of ORC  
412 with origins, we first queried whether Pch2 was associated with origins. We plotted Pch2 occupancy  
413 ( $\log_2$  genome-wide enrichment of Pch2 wild-type and E399Q) around the center of 798 predicted ARSs  
414 (from OriDB (<http://cerevisiae.oridb.org>); this list includes dubious, likely and confirmed ARSs). This  
415 analysis did not reveal enrichment for Pch2 at or around ARSs (Figure 3B). To confirm this observation,  
416 we recalled Pch2 peaks using a substantially reduced significance threshold (*i.e.* a p-value of 0.5 instead  
417 of the previously mentioned  $1e-15$ ) [36], but this equally did not show any enrichment (data not shown).  
418 Further, using algorithms previously employed to detect association of ORC with ARSs (*i.e.* MACs peak



419 calling [48]) similarly failed to reveal enrichment of Pch2 to ARSs (data not shown). The observation that  
420 Pch2 does not significantly associate with origins of replication was further strengthened by ChIP-qPCR  
421 investigating individual origins (Figure 3C). We conclude that Pch2 is not detectably associated with  
422 euchromatic origins of replication during meiotic G2/prophase, hinting that the interaction between Pch2  
423 and Orc1 occurs away from origins of replication [47]. Previous studies have described association of  
424 components of the replication machinery (including ORC) to actively transcribed, protein coding genes  
425 [49-51], and we thus considered the possibility that ORC exhibited a binding pattern similar to that of  
426 Pch2 during meiosis. We analyzed Orc1-TAP binding by ChIP-qPCR: as a positive control, we measured  
427 its association to *ARS1116*, and as expected found Orc1 to be highly enriched at this site (Figure 3D).  
428 Strikingly, we also detected substantial binding of Orc1-TAP with *GAP1* and *HOP1*, but not *PPR1*  
429 (Figure 3D and Supplementary Figure 4A). Similar results were seen for Orc2-TAP (Figure 3D),  
430 suggesting that the ORC complex may be associated to (non-origin) genomic regions that are also  
431 occupied by Pch2. To further explore the possibility that Orc1 functions upstream of Pch2 with respect to  
432 its localization – as has been suggested within the nucleolus/rDNA [28, 46] – we made use of a  
433 temperature sensitive allele of *ORC1*, *orc1-161* (Supplementary figure 4B). Pre-meiotic DNA replication  
434 is delayed for ~1 hour in *orc1-161* cells, but meiotic progression is otherwise normal (Supplementary  
435 figure 4C) [28]. This mutation severely diminished ORC association with origins of replication (as  
436 measured by ORC2-TAP ChIP; Supplementary figure 4D), even at permissive temperatures (23°C),  
437 likely due to a reduction in Orc1 protein levels (Supplementary figure 4B) [52]. The levels of Orc2-TAP  
438 at *GAP1* were reduced under these conditions (Supplementary figure 4D). We next performed Pch2 ChIP-  
439 qPCR in yeast strains harboring temperature-sensitive alleles of either *ORC1* (*orc1-161*) or *ORC2* (*orc2-*  
440 *1*). Strikingly, as shown in Figure 3E, in *orc1-161* cells, Pch2 levels were strongly depleted at *GAP1*,  
441 indicating that Orc1 contributes to the chromosomal association of Pch2, also outside the nucleolus. Pch2  
442 protein levels were unchanged under these conditions (Supplementary Figure 4E). Orc2 was readily  
443 detected in *ORC2* cells but barely detected in *orc2-1* cells (Supplementary figure 4F). In contrast to the  
444 effects seen in *orc1-161*, ChIP-qPCR analysis of 3xHA-Pch2-E399Q revealed no effect of *orc2-1* on  
445 recruitment to *GAP1* (for these experiments, the cultures were shifted to 30°C once the meiotic program  
446 was induced) (Supplementary Figure 4G and H). Thus, although we cannot rule out that incomplete  
447 inactivation of Orc2 in *orc2-1* obscures effects on Pch2 recruitment, these data collectively strongly  
448 suggest that Orc1 is involved in promoting the chromosomal association of Pch2. Cytological analysis  
449 showed that Pch2 localization to the nucleolus/rDNA is severely impaired in *orc1-161* cells [28]. Our  
450 ChIP analysis indicated that Orc1 also contributes to recruitment at non-rDNA loci, and accordingly,  
451 using immunofluorescence on spread chromosomes we found that in *orc1-161* cells Pch2 localization was  
452 diminished within non-rDNA regions (Figure 3F and G). Together, these analyses indicate that ORC, and  
453 particularly Orc1, are involved in and affect the localization of Pch2 at euchromatic chromosomal  
454 regions. Orc1 contains a Bromo Adjacent Homology (BAH) domain, a nucleosome-binding domain [53]



455 that contributes to ORC's ability to bind origins of replication [54] (Figure 3A). We and others have  
456 revealed a role for the BAH of Orc1 in controlling rDNA-associated functions [28, 55], and we  
457 interrogated whether occupancy of Pch2 to regions of transcriptional activity was affected in *orc1Δbah*  
458 cells. Indeed, deletion of the BAH domain of Orc1 significantly reduced the association of Pch2 to sites  
459 of active transcription (Figure 3H and Supplementary Figure 4I and J). Collectively, these results suggest  
460 that ORC/Orc1 may use its nucleosome-binding capacity (endowed by the BAH domain of Orc1) to bind  
461 to and recruit Pch2 to non-canonical (*i.e.* non-origin) genomic loci that are defined by transcriptional  
462 activity. In light of this, it is interesting to note that Orc1-BAH binding to nucleosomes – in contrast to a  
463 related BAH domain in Sir3 [56] – is insensitive to the acetylation state of Histone H4, which could  
464 allow effective engagement with nucleosomes within euchromatin [55].

465 Hop1, a HORMA-domain containing client of Pch2 is a central component of the meiotic axis structure  
466 [7, 14, 17, 24-27, 57]. Zip1-dependent SC assembly (which drives Pch2 recruitment [17]), is established  
467 on the axial element of the meiotic chromosome structure, and Hop1 and Zip1 are therefore expected to  
468 reside in molecular proximity of each other (at and near chromosome axis sites, respectively). As such,  
469 one hypothesis is that Pch2 is also enriched at meiotic axis-proximal sites. We compared the binding  
470 patterns of Pch2 to those of axial components (*i.e.* Red1, Hop1 and Rec8) by plotting available ChIP-seq  
471 datasets for Hop1, Red1 and Rec8 [8] and overlaying them with our Pch2 ChIP-seq datasets (Figure 4A).  
472 Hop1, Red1 and Rec8 showed highly similar binding patterns [7] [8], but strikingly, the binding patterns  
473 of Pch2 qualitatively diverged from the patterns of these axial elements (Figure 4A, and Supplementary  
474 Figure 5A and B). Specifically, Pch2 patterns did not show the similar frequency along chromosomal  
475 regions, and showed little overlap with the binding patterns of meiotic axis-factors. We conclude that the  
476 pool of Pch2 that we identified does not co-localize with the meiotic axis factors Hop1, Red1 and Rec8,  
477 and propose that, within the loop-axis organization of meiotic chromosomes, Pch2 associates with (a  
478 selected group of) genes that are located within loops that emanate away from the Hop1-Red1-Rec8-  
479 defined axis (Figure 4B). Because of this apparent spatial separation between Pch2 and its axial substrate  
480 Hop1, we asked whether impairing the recruitment of Pch2 to regions of active transcription affected the  
481 chromosomal abundance of Hop1 in meiotic G2/prophase. In *pch2Δ* cells, abundance of Hop1 on  
482 synapsed chromosomes is increased [14, 17, 58]. In addition, phosphorylation of Hop1 [59] increases in  
483 *pch2Δ* cells [14]. We used cytological and ChIP-based approaches to test effects of acute removal of Pch2  
484 from regions of transcriptional activity (via our Rpo21-FRB-based system) on Hop1 chromosomal  
485 abundance. First, we quantified Hop1 chromosomal association with synapsed chromosomes under  
486 conditions where RNAPII-inhibition caused diminished localization of Pch2 (*i.e.* 30 minutes long  
487 exposures to rapamycin) (Figure 4C and D). Under these conditions, we did not observe significant  
488 changes in Hop1. We exposed cells to rapamycin for longer periods (*i.e.* 90 instead of 30 minutes), and  
489 under these conditions, Pch2 loss from chromosomes was more pronounced as compared to the loss  
490 observed upon short treatments (Supplementary Figure 6A-C). However, this was not accompanied by a

491 detectable increase in the abundance of Hop1 on synapsed chromosomes (Supplementary Figure 6D-E).  
492 These experiments were all performed in early meiotic G2/prophase (*i.e.* after 4 hours into the meiotic  
493 program), and we also investigated effects later in meiotic G2/prophase (*i.e.* after 8 hours (in *ndt80Δ*  
494 cells, to prevent exit from G2/prophase). Also under these conditions, brief inhibition of RNAPII did not  
495 lead to significant effects on Hop1 chromosomal recruitment (data not shown). We next investigated  
496 Hop1 chromosomal levels by ChIP-qPCR, based on published Hop1 ChIP-seq datasets in wild type and  
497 *pch2Δ* cells [38], but equally did not find effects of acute inhibition of RNAPII on Hop1 chromosomal  
498 abundance at a selected locus (Supplementary Figure 6F and G). Finally, we probed the accumulation of  
499 the phosphorylated version of Hop1 (identified by a slower migrating band on SDS-PAGE gels). In  
500 accordance with earlier observations, we did not observe differences in the amount of phosphorylated  
501 Hop1 under conditions of RNAPII depletion (Figure 4E and F). Based on all cumulative experiments, we  
502 suggest that the pool of Pch2 that is associated with sites of active RNAPII-dependent transcription is not  
503 involved in regulating the chromosomal association of Hop1. This conclusion is in agreement with the  
504 observation that the binding sites for Pch2 that we identify here are not overlapping with chromosome  
505 axis sites, as defined by Hop1 (and Red1/Rec8).

506 Finally, we aimed to address further requirements for Pch2 association with selected regions of active  
507 RNAPII-dependent transcription. Most of the identified binding regions fall within genes that are also  
508 active in vegetatively growing cells (with the exception of a subset of meiosis-specific genes). In addition,  
509 Orc1/ORC is equally present in vegetatively growing cells. Therefore, we investigated whether ectopic  
510 expression of Pch2 – normally only expressed in meiosis – was sufficient to promote association with  
511 selected regions of binding, as identified in our ChIP analysis. We generated a galactose-inducible allele  
512 of Pch2 (*pGAL10-3HA-pch2-E399Q*) to induce Pch2-E399Q to protein levels comparable to those  
513 observed in meiotic G2/prophase (Figure 5A and B). ChIP-qPCR analysis revealed that, in contrast to the  
514 situation in meiotic cells, Pch2-E399Q was unable to associate with *GAP1* in mitosis, despite the fact that  
515 this gene was actively transcribed during vegetative growth (Figure 5C and D). These results show that  
516 active transcription and presence of Orc1/ORC are not sufficient for the association of Pch2 with selected  
517 regions of active transcription, and instead suggest the presence of meiosis-specific factors that ‘license’  
518 Pch2 binding. In agreement with such a model, we found that during meiosis, Zip1 was required for the  
519 recruitment of Pch2 to *GAP1* (Figure 5E and Supplementary Figure 7A-C). As such, our results reveal an  
520 intricate connection between transcription, ORC/Orc1 function and meiosis-specific chromosome  
521 organization that allows the recruitment of a specific chromosomal pool of Pch2 (Figure 5F), an  
522 important regulator of meiotic chromosome metabolism.

## 523 Discussion

524 The AAA+ protein Pch2 controls meiotic DSB formation, influences crossover recombination,  
525 mediates a meiotic G2/prophase checkpoint and is involved in chromosome reorganization upon  
526 chromosome synapsis (reviewed in [19]). For many functions, the chromosomal association of Pch2 has  
527 been postulated to be crucial. During meiotic G2/prophase Pch2 is enriched within the nucleolus/rDNA,  
528 and is also detected on synapsed chromosomes [17]. Chromosome synapsis is mediated by the dynamic  
529 polymerization of the synaptonemal complex (SC), whose formation is mostly nucleated at sites of  
530 crossover recombination [9-11]. Synapsis-dependent recruitment of Pch2 is abolished in cells that lack  
531 Zip1, the central element of the SC [12, 13, 17]. In addition to Zip1, other factors influence the  
532 chromosomal distribution of Pch2: Sir2 and Orc1 promote the nucleolar localization of Pch2 [21, 28],  
533 whereas Dot1 influences global chromosomal abundance of Pch2 [21, 22]. Here, we present a  
534 comprehensive analysis of the chromosomal association of Pch2 via genome-wide ChIP-seq.  
535 Surprisingly, we reveal that Pch2 is associated with a subset of actively transcribed RNAPII-dependent  
536 genes. We perform several experiments and analyses to ascertain that these binding patterns are  
537 biologically meaningful and not caused by ChIP-associated artefacts (see Supplementary results and  
538 discussion). Recruitment of Pch2 is dependent on active RNAPII-dependent transcription, but  
539 transcriptional strength *per se* is not a determining factor. For example, many actively transcribed genes  
540 do not recruit significant amounts of Pch2. Additional bioinformatics analysis failed to reveal any specific  
541 underlying characteristics of gene content driving Pch2 association. If not solely determined by  
542 transcriptional strength and specific DNA content, what are additional factors that influence Pch2  
543 association? We find that, Orc1, a component of ORC, is required for Pch2 association with actively  
544 transcribed genes. The connection between Pch2 and Orc1 at genomic regions that are distinct from  
545 origins of replication further underscores the non-canonical role played by Orc1 during meiotic  
546 G2/prophase [47]. In addition, since Orc1 is also involved in nucleolar recruitment of Pch2 [28, 46], these  
547 findings hint at a common biochemical foundation that underlies recruitment of Pch2 to diverse  
548 chromatin environments. A recent study did not detect a role for Orc1 on the chromosomal (non-  
549 nucleolar) recruitment of Pch2 [46], and we speculate that differences in the experimental approaches that  
550 were used to interfere with Orc1 function might underlie this discrepancy. We show here that the Bromo-  
551 Adjacent Homology BAH-domain of Orc1, a nucleosome-binding module contributes to targeting of  
552 Pch2. BAH domains are readers of chromatin state [53]. A structural characteristic of a related BAH  
553 domain (*i.e.* that of budding yeast Sir3) is that nucleosome association is sensitive to Dot1-mediated  
554 Histone H3 K79 methylation (H3K79me) [56]. Dot1 activity (and H3-K79 methylation state) is important  
555 for Pch2 localization along chromosomes [22]. Dot1 activity is associated with active RNAPII  
556 transcriptional activity (reviewed in [60]), and RNAPII transcription-associated Dot1 activity may thus  
557 affect binding patterns of Pch2, potentially through Orc1 BAH domain-mediated nucleosome interactions.  
558 Of note, by analyzing correlations between our Pch2 data sets with genome wide maps of several histone

559 modifications [61], we found a correlation between genome-wide Pch2 binding and H3K79-  
560 monomethylation patterns (data not shown). We thus speculate that epigenetic state (*i.e.* specific  
561 chromatin modifications) could contribute to Pch2 recruitment within euchromatin. Previous work has  
562 established that Pch2 localizes to the nucleolus [21], the site of RNAPI-driven rDNA transcription. The  
563 nucleolus is a membrane-less, self-organized nuclear compartment that exhibits properties of a liquid-  
564 liquid phase separated nuclear condensate (reviewed in [62]). Interestingly, recent work revealed the  
565 existence of RNAPII-specific nuclear condensates that influence transcriptional regulation (reviewed in  
566 [43]). In the future, it will be interesting to investigate whether the biochemical properties of  
567 transcriptional condensates relate to (shared) characteristics for the recruitment and function of Pch2 at  
568 RNAPI- and RNAPII-transcriptional hubs.

569 Meiotic chromosomes are organized into a typical loop-axis structure [3] [4]. Our genome-wide mapping  
570 revealed that the Pch2 binding patterns are strikingly distinct from the stereotypical binding patterns of  
571 meiotic axis factors (*i.e.* Hop1, Red1 and Rec8) [7, 8]. We suggest that the transcription-associated pool  
572 of Pch2 is not directly associated with chromosome axis sites and is instead associated with genes in loop  
573 regions. This is surprising, since *i)* the only identified client of Pch2, Hop1 is a component of the axis,  
574 and *ii)* assembly of the SC, a structure that is assembled directly on the axis factors, is important to allow  
575 Pch2 recruitment to chromosomes. The observed Pch2 binding pattern may indicate that the pool of Pch2  
576 identified here plays a role that is distinct from the canonical role of Pch2 in the removal of the bulk of  
577 Hop1 from meiotic axis sites. Accordingly, interference with recruitment of this Pch2 population (via  
578 transcriptional inhibition) did not affect the chromosomal association of Hop1. We cannot rule out that  
579 incomplete inhibition of Pch2 association under the used conditions precludes us from exposing a  
580 contribution for this population of Pch2 in regulating Hop1. Nonetheless, also when considering the  
581 localization patterns of Pch2 described here, we speculate that more than one chromosomal populations of  
582 Pch2 might exist, of which one is recruited to transcriptionally active regions. In that scenario, a  
583 population of Pch2 that is directed to chromosome axis sites (and can conceivably not be detected using  
584 ChIP-based approaches) might be responsible for the majority of Hop1 removal upon chromosome  
585 synapsis.

586 Why and how does synapsis (*i.e.* Zip1 polymerization) contribute to the recruitment of the transcription-  
587 associated Pch2 population (Figure 5), and what is the role of the transcription-associated pool of Pch2?  
588 SC polymerization along synapsing chromosomes has been proposed to trigger mechanical reorganization  
589 [63], which might influence large-scale topological organization of loop-axis structures, and Pch2  
590 localization. Indeed, previous work has identified a connection between topoisomerase II function,  
591 meiotic chromosome reorganization and Pch2 recruitment [23, 64]. It will be interesting to further  
592 understand the link between transcription, chromosome topology and organization and Pch2 recruitment.  
593 Many if not all of the roles Pch2 plays in meiosis have been attributed to its biochemical effects on Hop1  
594 (reviewed in [19]). Although bulk Hop1 removal was not affected under conditions where a transcription-

595 associated population of Pch2 was displaced (Figure 4), it remains possible that local Hop1 behavior is  
596 affected by this population. In addition, Pch2 impacts global DSB activity [38], and the specific  
597 recruitment of Pch2 to defined chromosomal regions might conceivably impact local DSB patterning.  
598 Finally, it will be interesting to consider whether the association of Pch2 with actively transcribed regions  
599 is in any way related to transcriptional regulation.

600 In conclusion, we have used genome-wide methodology to reveal a hitherto unknown relationship  
601 between Pch2, active transcription and Orc1, which influences the chromosome synapsis-driven  
602 recruitment of Pch2 to euchromatin during meiotic G2/prophase. Future work should increase our  
603 understanding of dynamic chromosome recruitment of this important regulator of meiotic DSB formation,  
604 recombination and checkpoint signaling.

605

606 **Acknowledgements**

607 We thank members of the Vader and Bird laboratories for ideas and helpful discussions. We  
608 gratefully acknowledge financial support by the European Research Council (ERC Starting Grant  
609 URDNA, agreement nr. 638197, to GV), a CAPES-Humboldt fellowship from the Alexander von  
610 Humboldt Foundation (agreement nr. 99999.000021/2016-04, to RCS) and the Max Planck Society. We  
611 thank Andrea Musacchio (Max Planck Institute of Molecular Physiology, Dortmund, Germany) for  
612 ongoing support. We thank Jonna Heldrich and Andreas Hochwagen (NYU, New York City, USA) for  
613 sharing unpublished RNA-seq datasets. We acknowledge Stephen Bell (MIT, Cambridge, USA), Amy  
614 MacQueen (Wesleyan University, Middletown, USA) and Nancy Hollingsworth (Stony Brook  
615 University, Stony Brook, USA) for sharing reagents.

616

617 **Author contributions**

618 Conception and experimental design: RCS and GV. Experimentation: RCS and MAVF.  
619 Computational analyses: RCS; Data analysis: GV and RCS; Supervision: GV; Manuscript: RCS and GV  
620 with input from MAVF.

621

622 **Competing interests**

623 The authors declare no competing financial interests.

624

625

626



## 627 **Figure legends**

628

### 629 **Figure 1. Genome-wide analysis of Pch2 chromosome association**

630 A. Schematic of Pch2 domain organization. B. Western blot analysis of expression of 3XFLAG-Pch2 and  
631 3XFLAG-Pch2-E399Q during meiotic G2/prophase. Time (hours) after induction into the meiotic  
632 program are indicated. C. Representative image of ChIP-seq binding patterns (ChIP and input) for  
633 3XFLAG-Pch2 and 3XFLAG-Pch2-E399Q. Shown is a region of Chromosome *XII* (chromosomal  
634 coordinates (kb) are indicated). D. High resolution examples of 3XFLAG-Pch2 binding patterns across  
635 two selected chromosomal regions. Chromosomal coordinates and gene organization are indicated. E.  
636 Whole genome average plotting of 3XFLAG-Pch2 and 3XFLAG-Pch2-E399Q binding peaks (log<sub>2</sub>).  
637 Datasets were aligned relative to the center of ORFs. F. ChIP-qPCR analysis of three locations along the  
638 *GAPI* locus during meiotic G2/prophase (4 hours). Primers pairs 1: yGV2595/yGV2596, 2:  
639 yGV2597/yGV2598, 3: yGV2599/yGV2600. Error bars represent standard error of at least three  
640 independent experiments performed in triplicate. G. Western blot analysis of expression of 3XFLAG-  
641 Pch2, 3XFLAG-Pch2-E399Q and 3XFLAG- $\Delta$ NTD-Pch2 during meiotic G2/prophase (4 hours). H. ChIP-  
642 qPCR analysis of 3XFLAG-Pch2, 3XFLAG-Pch2-E399Q and 3XFLAG- $\Delta$ NTD-Pch2 at *PPR1*  
643 (yGV2390/yGV2391), *GAPI* (yGV2597/yGV2598), *HOP1*(yGV2607/yGV2608), *TDH3*  
644 (yGV2591/yGV2592), and *SSA1* (yGV2587/yGV2588) during meiotic G2/prophase (4 hours). Error bars  
645 represent standard error of at least three independent experiments performed in triplicate.

646

### 647 **Figure 2. Transcription is required for recruitment of Pch2**

648 A. Schematic of the anchor away system and Rpo21 within RNAPII. B. Dilution series of wild type and  
649 *rpo21-FRB* anchor away strains, grown on YPD or YPD + rapamycin solid medium. C. Schematic of  
650 treatment regimens used for anchor away experiments in D-H. D. Immunofluorescence of meiotic  
651 chromosome spreads in the *rpo21-FRB* anchor away treated with DMSO or rapamycin. E. ChIP-qPCR  
652 analysis of active transcription ( $\alpha$ -phosphoserine 5 Rpo21 ChIP) in *rpo21-FRB* anchor away treated with  
653 DMSO or rapamycin at *PPR1* (yGV2390/yGV2391) and *GAPI* (yGV2597/yGV2598). Error bars  
654 represent standard error of at least three independent experiments performed in triplicate. F. ChIP-qPCR  
655 analysis of 3XHA-Pch2 in *rpo21-FRB* anchor away treated with DMSO or rapamycin at *PPR1*  
656 (yGV2390/yGV2391), *GAPI* (yGV2597/yGV2598), *HOP1*(yGV2607/yGV2608), *TDH3*  
657 (yGV2591/yGV2592), and *SSA1* (yGV2587/yGV2588). Error bars represent standard error of at least  
658 three independent experiments performed in triplicate. G. Expression analysis of 3XHA-Pch2 in *rpo21-*  
659 *FRB* anchor away treated with DMSO or rapamycin. H. Immunofluorescence of meiotic chromosome  
660 spreads in the 3XHA-Pch2 expressing *rpo21-FRB* anchor away cells, treated with DMSO or rapamycin.  
661 Chromosome synapsis was assessed by  $\alpha$ -Gmc2 staining. I. Quantification of immunofluorescence as

662 shown in H, treated with DMSO or rapamycin. \*\*\* indicates a significance of  $p \leq 0.001$ , Mann-Whitney  
663 U test.

664

### 665 **Figure 3. Interplay between Pch2, Orc1 and transcription**

666 A. Schematic of Pch2 and ORC, including the domain organization of Orc1. B. Whole genome average  
667 plotting of 3XFLAG-Pch2 and 3XFLAG-Pch2-E399Q binding peaks ( $\log_2$ ). Datasets were aligned  
668 relative to the center of ARSs. C. ChIP-qPCR analysis of 3XFLAG-Pch2-E399Q at *PPR1*  
669 (*yGV2390/yGV2391*), *GAPI* (*yGV2597/yGV2598*), *ARS202* (*yGV2583/yGV2584*) and *ARS1116*  
670 (*yGV2577/yGV2578*) during meiotic G2/prophase (4 hours). Error bars represent standard error of at  
671 least three independent experiments performed in triplicate. D. ChIP-qPCR analysis of Orc1-TAP and  
672 Orc2-TAP at *PPR1* (*yGV2390/yGV2391*), *GAPI* (*yGV2597/yGV2598*), *HOP1* (*yGV2605/yGV2606*),  
673 *ARS1116* (*yGV2577/yGV2578*) during meiotic G2/prophase (4 hours). Error bars represent standard error  
674 of at least three independent experiments performed in triplicate. E. ChIP-qPCR analysis of 3XFLAG-  
675 Pch2-E399Q in *ORC1* or *orc1-161* background at *PPR1* (*yGV2390/yGV2391*) and *GAPI*  
676 (*yGV2597/yGV2598*) during meiotic G2/prophase (4 hours). Experiments were performed at 23°C. Error  
677 bars represent standard error of at least three independent experiments performed in triplicate. F.  
678 Immunofluorescence of meiotic chromosome spreads in 3XHA-Pch2 expressing *ORC1* or *orc1-161* cells.  
679 Chromosome synapsis was assessed by  $\alpha$ -Gmc2 staining. Experiments were performed at 23°C. G.  
680 Quantification of F. \*\*\* indicates a significance of  $p \leq 0.001$ , Mann-Whitney U test. H. ChIP-qPCR  
681 analysis of 3XHA-Pch2-E399Q in *ORC1* or *orc1 $\Delta$ Abah* background at *PPR1* (*yGV2390/yGV2391*), *GAPI*  
682 (*yGV2597/yGV2598*) during meiotic G2/prophase (4 hours). Error bars represent standard error of at  
683 least three independent experiments performed in triplicate.

684

### 685 **Figure 4. Functional analysis of the transcriptional-associated Pch2 chromosomal population**

686 A. Representative image of ChIP-seq binding patterns for 3XFLAG-Pch2, Hop1, Red1 and Rec8. Data  
687 for Hop1, Red1 and Rec8 are from [8]. Shown is a region of Chromosome *XII* (chromosomal coordinates  
688 (kb) are indicated). B. Model depicting the proposed localization pattern of Pch2 on loops, within the  
689 meiotic chromosome loop-axis structure. C. Immunofluorescence of Hop1 on meiotic chromosome  
690 spreads in *rpo21-FRB* anchor away cells, treated with DMSO or rapamycin, using the regimen indicated  
691 in Figure 2C. Chromosome synapsis was assessed by  $\alpha$ -Gmc2 staining. D. Quantification of F. n.s. (non-  
692 significant) indicates  $p > 0.05$ , Mann-Whitney U test. E. Schematic of treatment regimens used for anchor  
693 away experiment, as shown in F. F. Western blot analysis of Hop1 and Pch2 ( $\alpha$ -HA) in *rpo21-FRB*  
694 anchor away cells, treated with DMSO or rapamycin, as indicated in E. Upon DMSO or rapamycin  
695 treatment samples were taken every 30 minutes. Arrow indicates phosphorylated Hop1, \* indicates non-  
696 phosphorylated Hop1.

697

698 **Figure 5. Requirements of Pch2 binding in mitosis and meiosis**

699 A. Schematic of allele used for galactose-inducible mitotic expression of 3XHA-Pch2-E399Q. B.  
700 Western blot analysis of meiotic (*i.e.* endogenous) expression (4 hours) and ectopic expression of  
701 *pGAL10-3XHA-pch2-E399Q*. Hours of treatment with galactose are indicated. C. ChIP-qPCR analysis of  
702 3XHA-Pch2-E399Q at *PPR1* (yGV2390/yGV2391), *GAPI* (yGV2597/yGV2598) and *HOP1*  
703 (yGV2605/yGV2606) during in meiosis and mitosis. Time (hours) is indicated. Error bars represents  
704 standard error of at least three independent experiments performed in triplicate. D. ChIP-qPCR analysis  
705 of active transcription ( $\alpha$ -phosphoserine 5 Rpo21) *GAPI* (yGV2597/yGV2598), *HOP1*  
706 (yGV2605/yGV2606) in meiosis and mitosis. Hours are indicated. Error bars represent standard error of  
707 at least three independent experiments performed in triplicate. E. ChIP-qPCR analysis of 3XFLAG-Pch2-  
708 E399Q at *PPR1* (yGV2390/yGV2391) and *GAPI* (yGV2597/yGV2598) in wild type or *zip1* $\Delta$  cells during  
709 meiotic G2/prophase (4 hours). Error bars represent standard error of at least three independent  
710 experiments performed in triplicate. F. Model depicting the interplay between Pch2 binding, active  
711 transcription, Orc1 and chromosome organization.

712

## 713 References

- 714 1. Petronczki M, Siomos MF, Nasmyth K. Un menage a quatre: the molecular biology of  
715 chromosome segregation in meiosis. *Cell*. 2003;112(4):423-40.
- 716 2. Lam I, Keeney S. Mechanism and regulation of meiotic recombination initiation. *Cold Spring*  
717 *Harbor perspectives in biology*. 2015;7(1):a016634.
- 718 3. Moens PB, Pearlman RE. Chromatin organization at meiosis. *BioEssays : news and reviews in*  
719 *molecular, cellular and developmental biology*. 1988;9(5):151-3.
- 720 4. Zickler D, Kleckner N. Meiotic chromosomes: integrating structure and function. *Annual review*  
721 *of genetics*. 1999;33:603-754.
- 722 5. Hollingsworth NM, Goetsch L, Byers B. The *HOP1* gene encodes a meiosis-specific component  
723 of yeast chromosomes. *Cell*. 1990;61(1):73-84.
- 724 6. Smith AV, Roeder GS. The yeast Red1 protein localizes to the cores of meiotic chromosomes.  
725 *The Journal of cell biology*. 1997;136(5):957-67.
- 726 7. Panizza S, Mendoza MA, Berlinger M, Huang L, Nicolas A, Shirahige K, et al. Spo11-accessory  
727 proteins link double-strand break sites to the chromosome axis in early meiotic recombination.  
728 *Cell*. 2011;146(3):372-83.
- 729 8. Sun X, Huang L, Markowitz TE, Blitzblau HG, Chen D, Klein F, et al. Transcription dynamically  
730 patterns the meiotic chromosome-axis interface. *eLife*. 2015;4.
- 731 9. Page SL, Hawley RS. The genetics and molecular biology of the synaptonemal complex. *Annu*  
732 *Rev Cell Dev Biol*. 2004;20:525-58.
- 733 10. Agarwal S, Roeder GS. Zip3 provides a link between recombination enzymes and synaptonemal  
734 complex proteins. *Cell*. 2000;102(2):245-55.
- 735 11. Henderson KA, Keeney S. Tying synaptonemal complex initiation to the formation and  
736 programmed repair of DNA double-strand breaks. *Proceedings of the National Academy of*  
737 *Sciences of the United States of America*. 2004;101(13):4519-24.
- 738 12. Sym M, Engebrecht JA, Roeder GS. ZIP1 is a synaptonemal complex protein required for meiotic  
739 chromosome synapsis. *Cell*. 1993;72(3):365-78.
- 740 13. Tung KS, Roeder GS. Meiotic chromosome morphology and behavior in zip1 mutants of  
741 *Saccharomyces cerevisiae*. *Genetics*. 1998;149(2):817-32.
- 742 14. Subramanian VV, MacQueen AJ, Vader G, Shinohara M, Sanchez A, Borde V, et al.  
743 Chromosome Synapsis Alleviates Mek1-Dependent Suppression of Meiotic DNA Repair. *PLoS*  
744 *biology*. 2016;14(2):e1002369.
- 745 15. Lao JP, Cloud V, Huang CC, Grubb J, Thacker D, Lee CY, et al. Meiotic crossover control by  
746 concerted action of Rad51-Dmc1 in homolog template bias and robust homeostatic regulation.  
747 *PLoS genetics*. 2013;9(12):e1003978.
- 748 16. Thacker D, Mohibullah N, Zhu X, Keeney S. Homologue engagement controls meiotic DNA  
749 break number and distribution. *Nature*. 2014;510(7504):241-6.
- 750 17. San-Segundo PA, Roeder GS. Pch2 links chromatin silencing to meiotic checkpoint control. *Cell*.  
751 1999;97(3):313-24.
- 752 18. Roig I, Dowdle JA, Toth A, de Rooij DG, Jasin M, Keeney S. Mouse *TRIP13/PCH2* is required  
753 for recombination and normal higher-order chromosome structure during meiosis. *PLoS genetics*.  
754 6(8).
- 755 19. Vader G. Pch2(TRIP13): controlling cell division through regulation of HORMA domains.  
756 *Chromosoma*. 2015;124(3):333-9.
- 757 20. Mitra N, Roeder GS. A novel nonnull *ZIP1* allele triggers meiotic arrest with synapsed  
758 chromosomes in *Saccharomyces cerevisiae*. *Genetics*. 2007;176(2):773-87.
- 759 21. San-Segundo PA, Roeder GS. Role for the silencing protein Dot1 in meiotic checkpoint control.  
760 *Molecular biology of the cell*. 2000;11(10):3601-15.
- 761 22. Ontoso D, Acosta I, van Leeuwen F, Freire R, San-Segundo PA. Dot1-dependent histone H3K79  
762 methylation promotes activation of the Mek1 meiotic checkpoint effector kinase by regulating the  
763 Hop1 adaptor. *PLoS genetics*. 2013;9(1)
- 764 23. Heldrich J SX, Vale-Silva LA, Markowitz TE, Hochwagen A. Topoisomerases modulate the  
765 timing of meiotic DNA breakage and repair. *BioRxiv*. 2019. doi: doi: 10.1101/672337.

- 766 24. Wojtasz L, Daniel K, Roig I, Bolcun-Filas E, Xu H, Boonsanay V, et al. Mouse HORMAD1 and  
767 HORMAD2, two conserved meiotic chromosomal proteins, are depleted from synapsed  
768 chromosome axes with the help of TRIP13 AAA-ATPase. *PLoS genetics*. 2009;5(10):e1000702.
- 769 25. Ye Q, Kim DH, Dereli I, Rosenberg SC, Hagemann G, Herzog F, et al. The AAA+ ATPase  
770 TRIP13 remodels HORMA domains through N-terminal engagement and unfolding. *The EMBO*  
771 *journal*. 2017;36(16):2419-34.
- 772 26. Chen C, Jomaa A, Ortega J, Alani EE. Pch2 is a hexameric ring ATPase that remodels the  
773 chromosome axis protein Hop1. *Proceedings of the National Academy of Sciences of the United*  
774 *States of America*. 2014;111(1):E44-53.
- 775 27. Ye Q, Rosenberg SC, Moeller A, Speir JA, Su TY, Corbett KD. TRIP13 is a protein-remodeling  
776 AAA+ ATPase that catalyzes MAD2 conformation switching. *eLife*. 2015;4.
- 777 28. Vader G, Blitzblau HG, Tame MA, Falk JE, Curtin L, Hochwagen A. Protection of repetitive  
778 DNA borders from self-induced meiotic instability. *Nature*. 2011;477(7362):115-9.
- 779 29. Bell SP, Kaguni JM. Helicase loading at chromosomal origins of replication. *Cold Spring Harbor*  
780 *perspectives in biology*. 2013;5(6).
- 781 30. Grigull J, Mnaimneh S, Pootoolal J, Robinson MD, Hughes TR. Genome-wide analysis of mRNA  
782 stability using transcription inhibitors and microarrays reveals posttranscriptional control of  
783 ribosome biogenesis factors. *Molecular and cellular biology*. 2004;24(12):5534-47.
- 784 31. Fujita T, Yuno M, Fujii H. enChIP systems using different CRISPR orthologues and epitope tags.  
785 *BMC Res Notes*. 2018;11(1):154.
- 786 32. Haruki H, Nishikawa J, Laemmli UK. The anchor-away technique: rapid, conditional  
787 establishment of yeast mutant phenotypes. *Molecular cell*. 2008;31(6):925-32.
- 788 33. Fan X, Moqtaderi Z, Jin Y, Zhang Y, Liu XS, Struhl K. Nucleosome depletion at yeast terminators  
789 is not intrinsic and can occur by a transcriptional mechanism linked to 3'-end formation.  
790 *Proceedings of the National Academy of Sciences of the United States of America*.  
791 2010;107(42):17945-50.
- 792 34. Silva RC, Dautel M, Di Genova BM, Amberg DC, Castilho BA, Sattlegger E. The Gcn2  
793 Regulator Yih1 Interacts with the Cyclin Dependent Kinase Cdc28 and Promotes Cell Cycle  
794 Progression through G2/M in Budding Yeast. *PloS one*. 2015;10(7):e0131070.
- 795 35. Blitzblau HG, Hochwagen A. ATR/Mec1 prevents lethal meiotic recombination initiation on  
796 partially replicated chromosomes in budding yeast. *eLife*. 2013;2:e00844.
- 797 36. Strino F, Lappe M. Identifying peaks in \*-seq data using shape information. *BMC Bioinformatics*.  
798 2016;17 Suppl 5:206.
- 799 37. Teytelman L, Thurtle DM, Rine J, van Oudenaarden A. Highly expressed loci are vulnerable to  
800 misleading ChIP localization of multiple unrelated proteins. *Proceedings of the National Academy*  
801 *of Sciences of the United States of America*. 2013;110(46):18602-7.
- 802 38. Subramanian VV, Zhu X, Markowitz TE, Vale-Silva LA, San-Segundo PA, Hollingsworth NM, et  
803 al. Persistent DNA-break potential near telomeres increases initiation of meiotic recombination on  
804 short chromosomes. *Nature communications*. 2019;10(1):970.
- 805 39. Kent WJ, Sugnet CW, Furey TS, Roskin KM, Pringle TH, Zahler AM, et al. The human genome  
806 browser at UCSC. *Genome research*. 2002;12(6):996-1006.
- 807 40. Collart MA, Struhl K. CDC39, an essential nuclear protein that negatively regulates transcription  
808 and differentially affects the constitutive and inducible *HIS3* promoters. *The EMBO journal*.  
809 1993;12(1):177-86.
- 810 41. Hanson PI, Whiteheart SW. AAA+ proteins: have engine, will work. *Nature reviews Molecular*  
811 *cell biology*. 2005;6(7):519-29.
- 812 42. Anders S, Huber W. Differential expression analysis for sequence count data. *Genome Biol*.  
813 2010;11(10):R106.
- 814 43. Cramer P. Organization and regulation of gene transcription. *Nature*. 2019;573(7772):45-54.
- 815 44. Vincenten N, Kuhl LM, Lam I, Oke A, Kerr AR, Hochwagen A, et al. The kinetochore prevents  
816 centromere-proximal crossover recombination during meiosis. *eLife*. 2015;4.
- 817 45. Humphryes N, Leung WK, Argunhan B, Terentyev Y, Dvorackova M, Tsubouchi H. The Ecm11-  
818 Gmc2 complex promotes synaptonemal complex formation through assembly of transverse  
819 filaments in budding yeast. *PLoS genetics*. 2013;9(1):e1003194.



- 820 46. Herruzo E, Santos B, Freire R, Carballo JA, San-Segundo PA. Characterization of Pch2  
821 localization determinants reveals a nucleolar-independent role in the meiotic recombination  
822 checkpoint. *Chromosoma*. 2019.
- 823 47. Villar-Fernández MA CdSR, Pan D, Weir E, Sarembe A, Raina VB, Weir JR, Vader G. A  
824 meiosis-specific AAA+ assembly reveals repurposing of ORC during budding yeast  
825 gametogenesis. *BiorXiv*. 2019. doi: /10.1101/598128
- 826 48. Feng J, Liu T, Qin B, Zhang Y, Liu XS. Identifying ChIP-seq enrichment using MACS. *Nat*  
827 *Protoc*. 2012;7(9):1728-40.
- 828 49. Snyder M, Huang XY, Zhang JJ. The minichromosome maintenance proteins 2-7 (MCM2-7) are  
829 necessary for RNA polymerase II (Pol II)-mediated transcription. *The Journal of biological*  
830 *chemistry*. 2009;284(20):13466-72.
- 831 50. Shor E, Warren CL, Tietjen J, Hou Z, Muller U, Alborelli I, et al. The origin recognition complex  
832 interacts with a subset of metabolic genes tightly linked to origins of replication. *PLoS genetics*.  
833 2009;5(12)
- 834 51. Azvolinsky A, Giresi PG, Lieb JD, Zakian VA. Highly transcribed RNA polymerase II genes are  
835 impediments to replication fork progression in *Saccharomyces cerevisiae*. *Molecular cell*.  
836 2009;34(6):722-34.
- 837 52. Aparicio OM, Weinstein DM, Bell SP. Components and dynamics of DNA replication complexes  
838 in *S. cerevisiae*: redistribution of MCM proteins and Cdc45p during S phase. *Cell*. 1997;91(1):59-  
839 69.
- 840 53. Callebaut I, Courvalin JC, Mornon JP. The BAH (bromo-adjacent homology) domain: a link  
841 between DNA methylation, replication and transcriptional regulation. *FEBS Lett*.  
842 1999;446(1):189-93.
- 843 54. Muller P, Park S, Shor E, Huebert DJ, Warren CL, Ansari AZ, et al. The conserved bromo-  
844 adjacent homology domain of yeast Orc1 functions in the selection of DNA replication origins  
845 within chromatin. *Genes & development*. 2010;24(13):1418-33.
- 846 55. De Ioannes P LV, Kuang Z, Wang M, Boeke JD, Hochwagen A, Armache KJ. Structure and  
847 function of the Orc1 BAH-nucleosome complex. *Nat Communications*. 2019;Jul 1;10(1):2894.
- 848 56. Armache KJ, Garlick JD, Canzio D, Narlikar GJ, Kingston RE. Structural basis of silencing: Sir3  
849 BAH domain in complex with a nucleosome at 3.0 Å resolution. *Science*. 2011;334(6058):977-82.
- 850 57. Joshi N, Barot A, Jamison C, Borner GV. Pch2 links chromosome axis remodeling at future  
851 crossover sites and crossover distribution during yeast meiosis. *PLoS genetics*. 2009; (5)7.
- 852 58. Borner GV, Barot A, Kleckner N. Yeast Pch2 promotes domainal axis organization, timely  
853 recombination progression, and arrest of defective recombinosomes during meiosis. *Proceedings*  
854 *of the National Academy of Sciences of the United States of America*. 2008;105(9):3327-32.
- 855 59. Carballo JA, Johnson AL, Sedgwick SG, Cha RS. Phosphorylation of the axial element protein  
856 Hop1 by Mec1/Tel1 ensures meiotic interhomolog recombination. *Cell*. 2008;132(5):758-70.
- 857 60. Wood K, Tellier M, Murphy S. DOT1L and H3K79 Methylation in Transcription and Genomic  
858 Stability. *Biomolecules*. 2018;8(1).
- 859 61. Weiner A, Hsieh TH, Appleboim A, Chen HV, Rahat A, Amit I, et al. High-resolution chromatin  
860 dynamics during a yeast stress response. *Molecular cell*. 2015;58(2):371-86.
- 861 62. Ditlev JA, Case LB, Rosen MK. Who's In and Who's Out-Compositional Control of Biomolecular  
862 Condensates. *Journal of molecular biology*. 2018;430(23):4666-84.
- 863 63. Zhang L, Liang Z, Hutchinson J, Kleckner N. Crossover patterning by the beam-film model:  
864 analysis and implications. *PLoS genetics*. 2014;10(1).
- 865 64. Zhang L, Wang S, Yin S, Hong S, Kim KP, Kleckner N. Topoisomerase II mediates meiotic  
866 crossover interference. *Nature*. 2014;511(7511):551-6.

867



# Figure 1

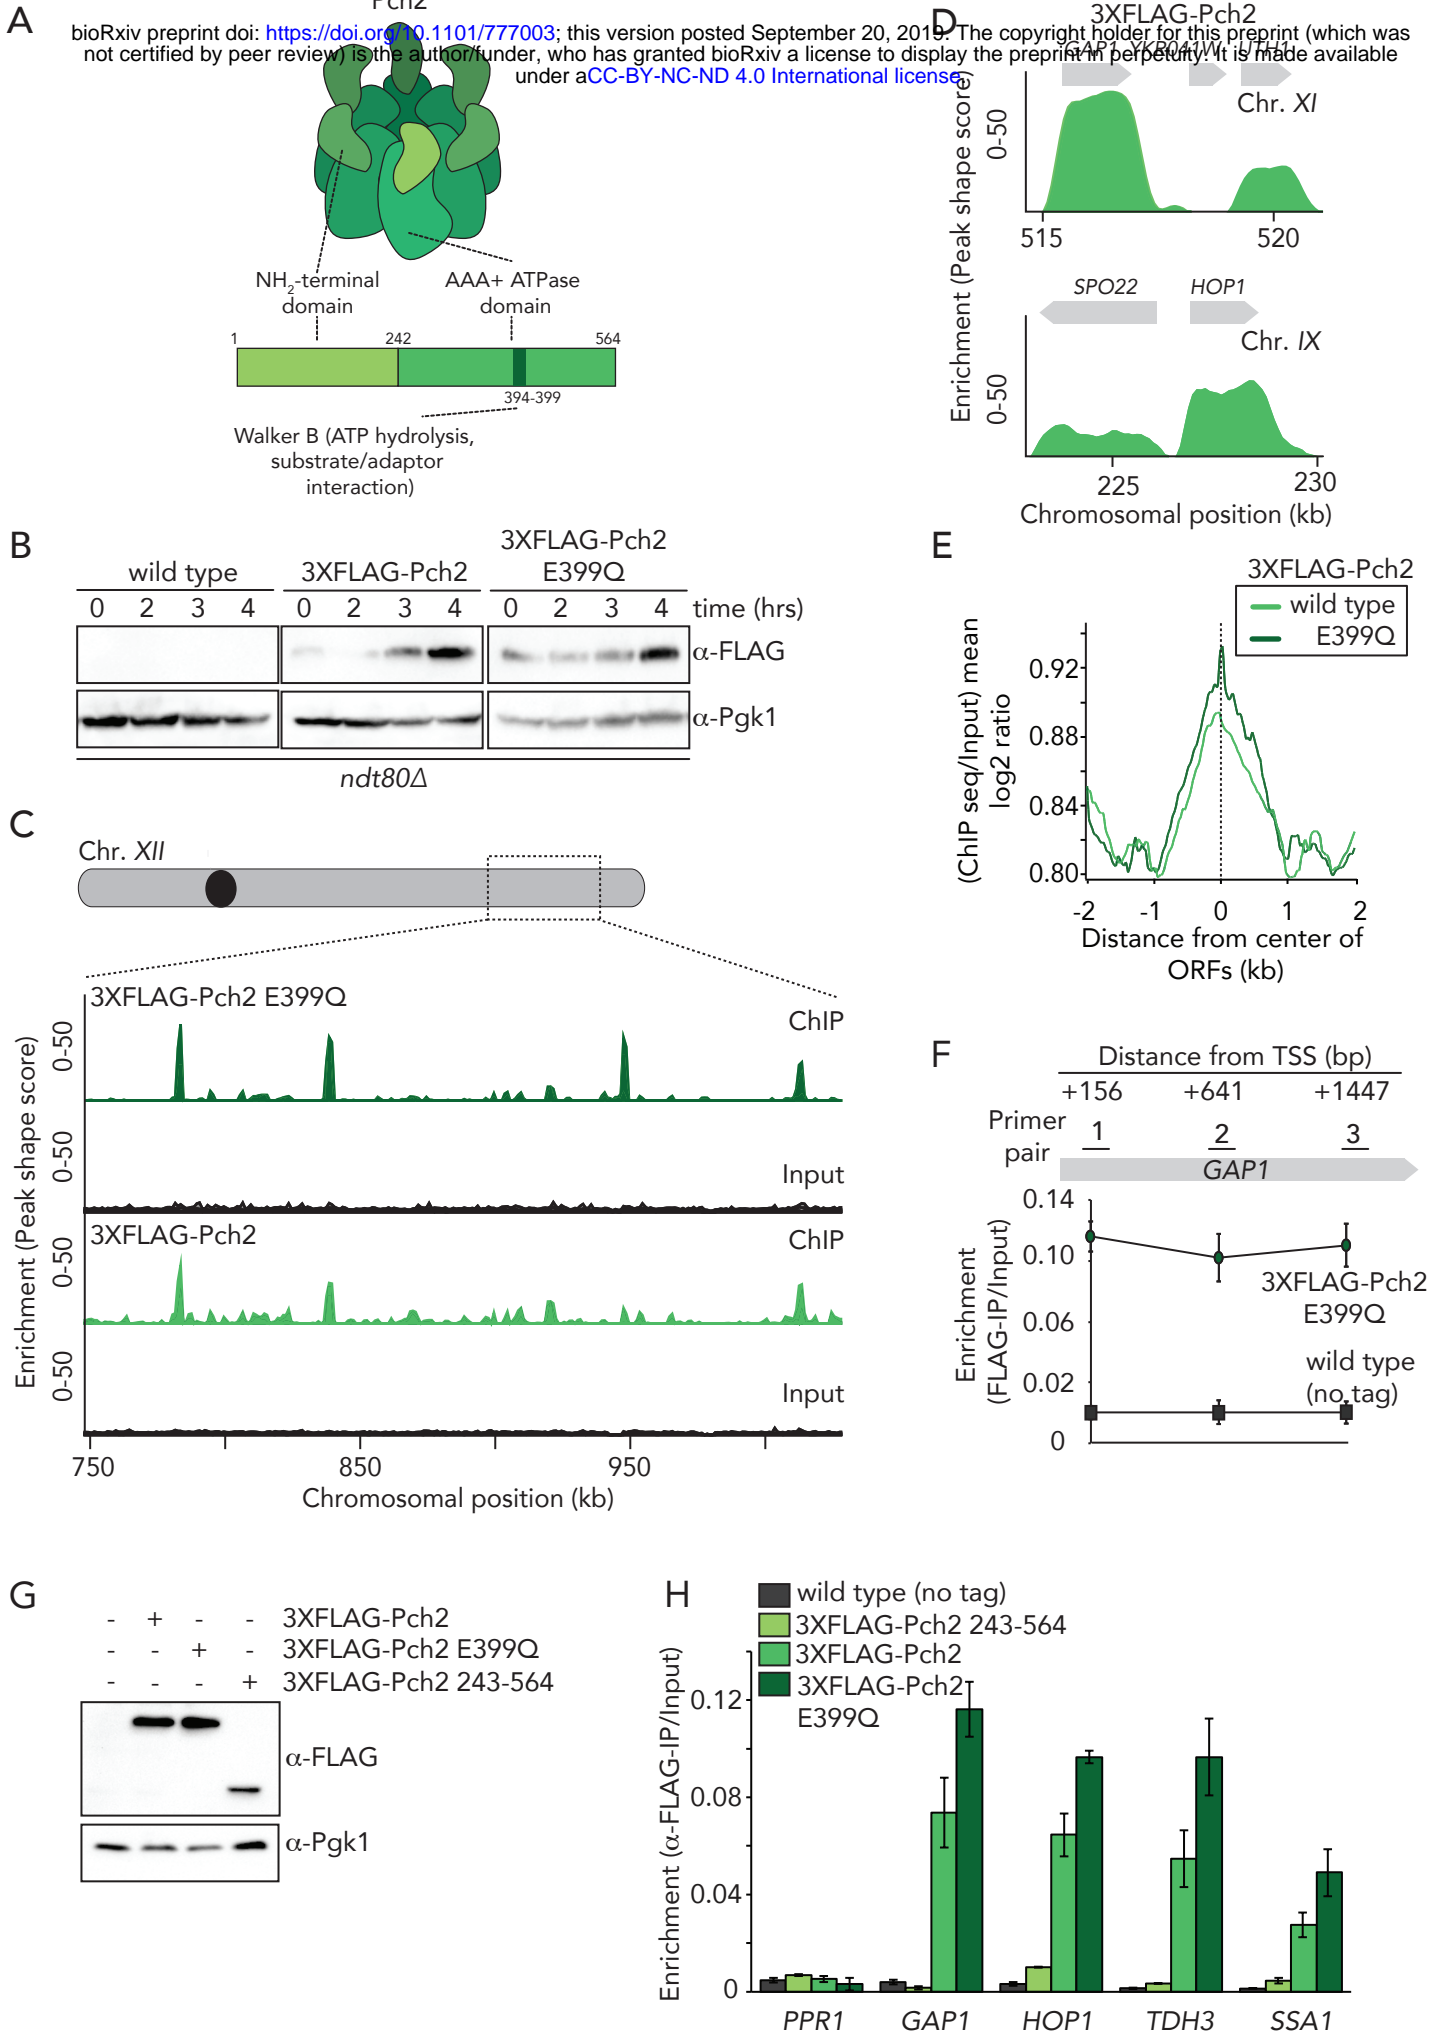

Figure 2

A

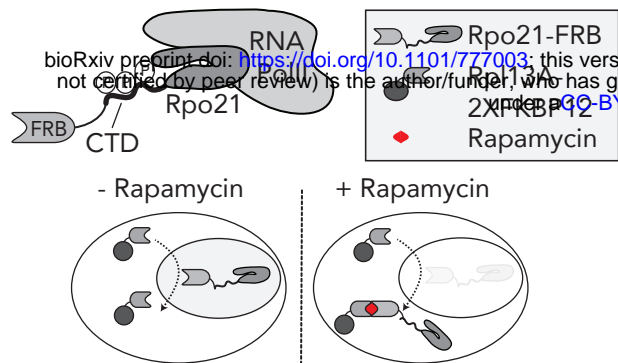

D

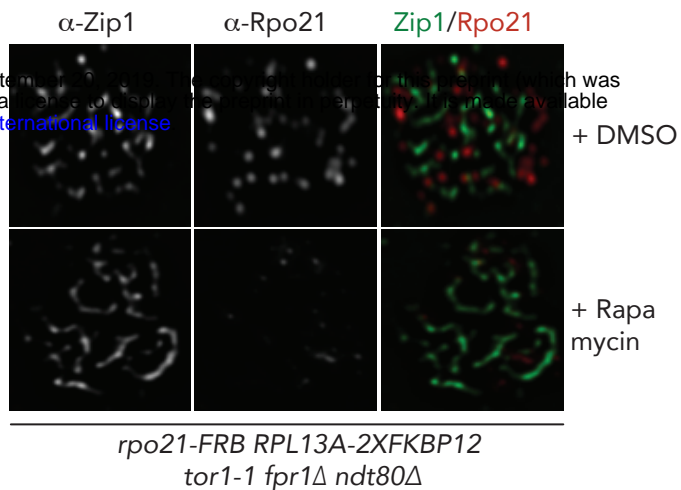

B

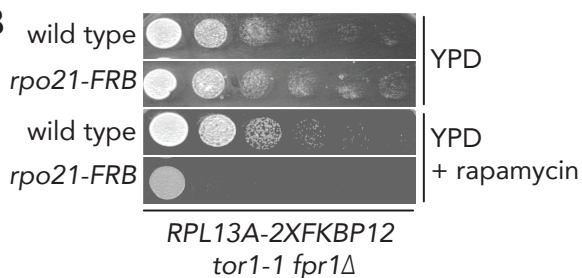

C

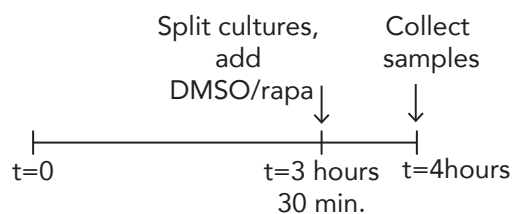

E

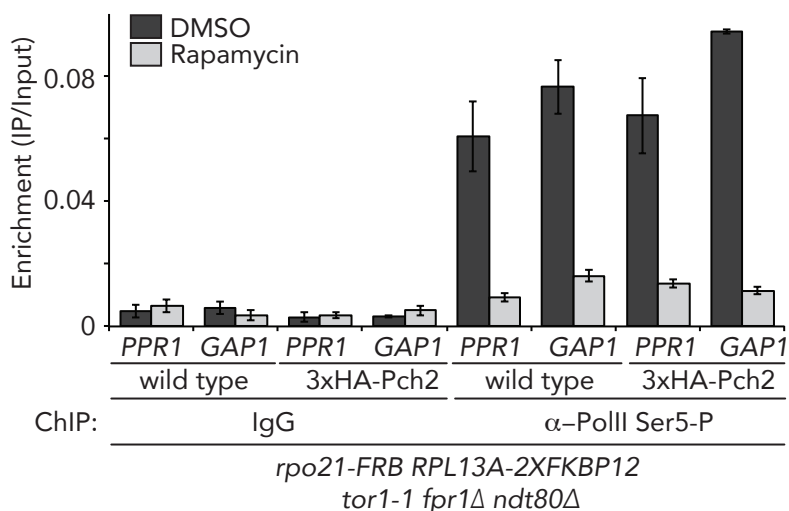

F

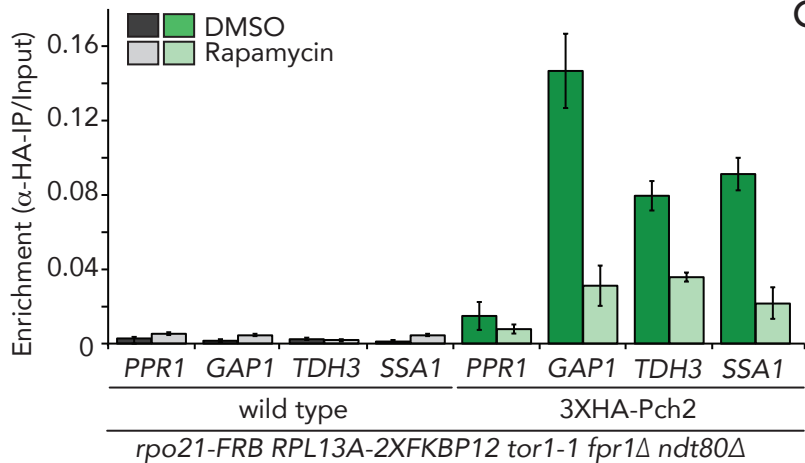

G

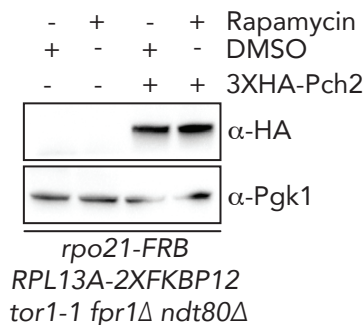

H

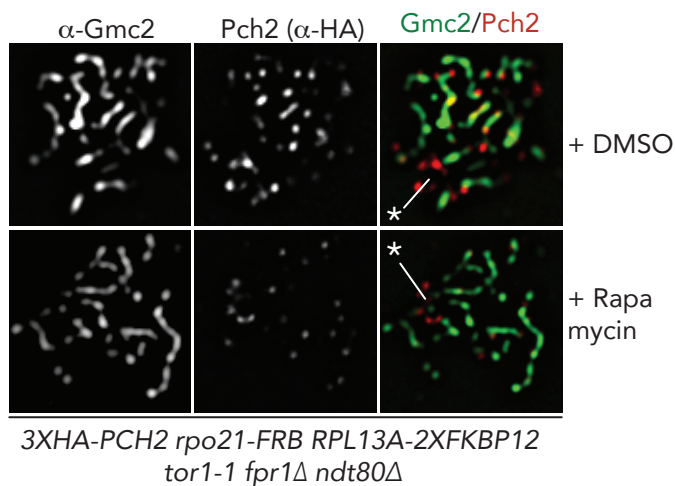

I

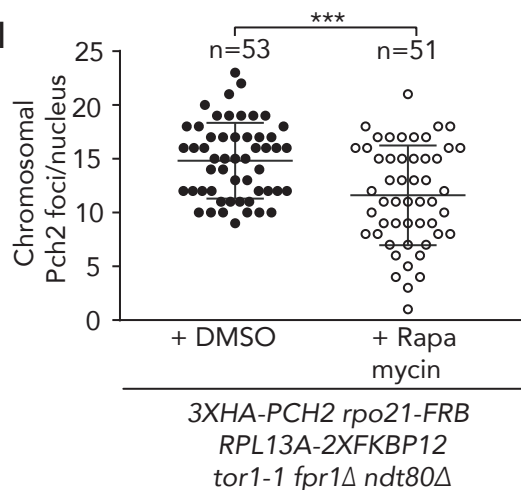

Figure 3

A

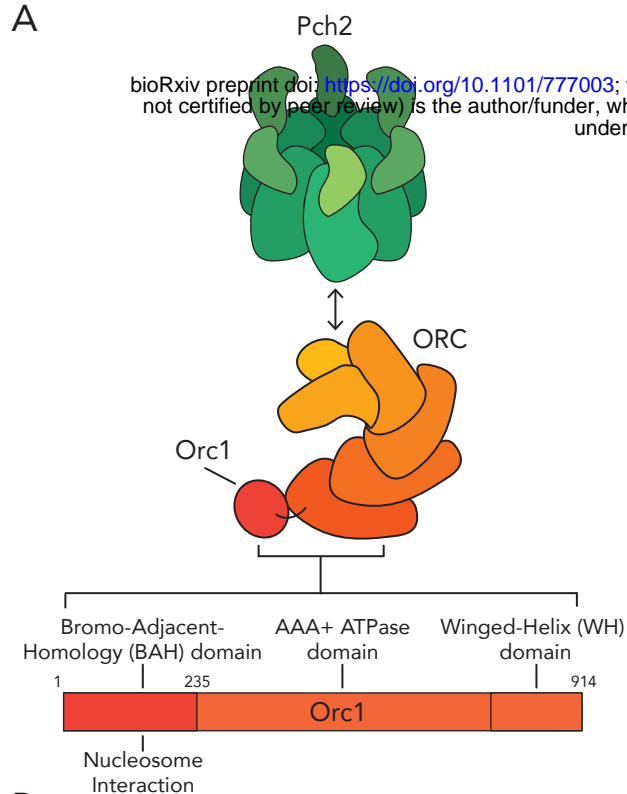

B

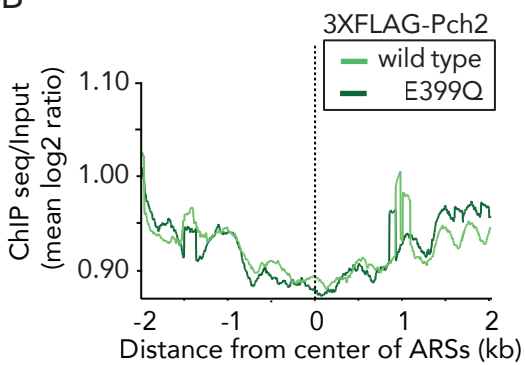

C

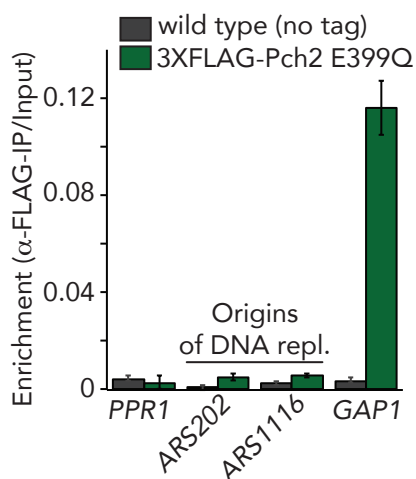

D

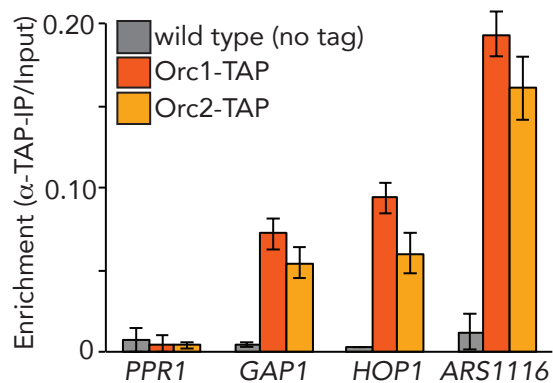

E

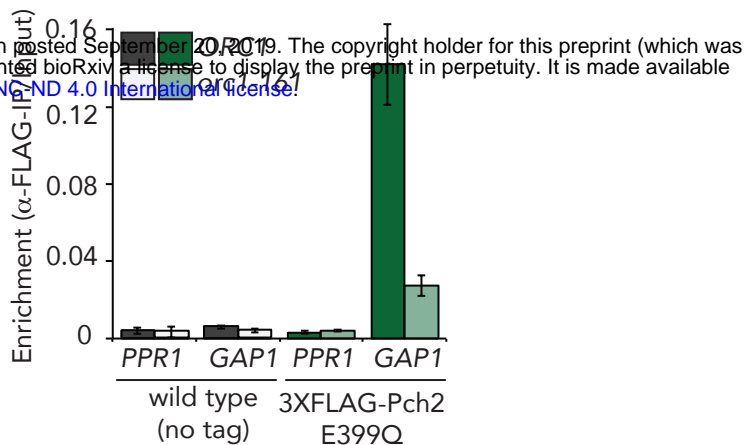

F

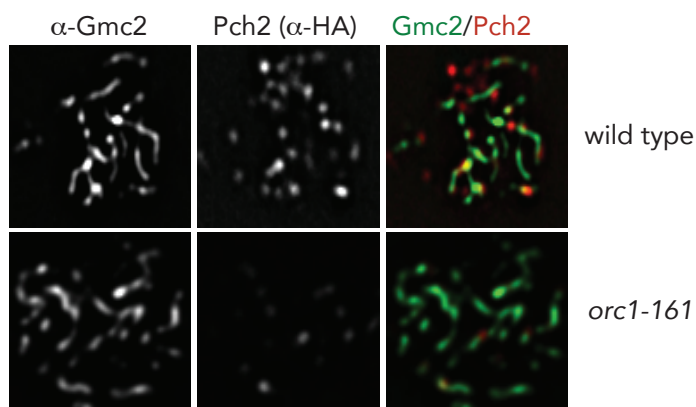

G

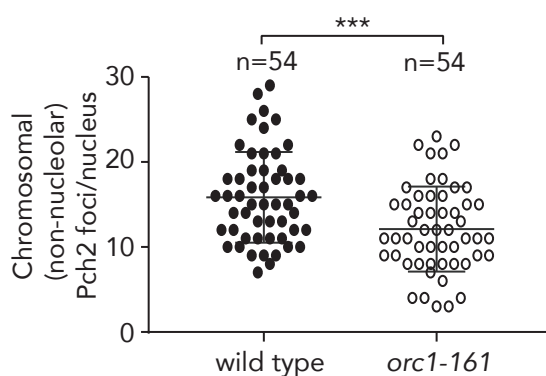

H

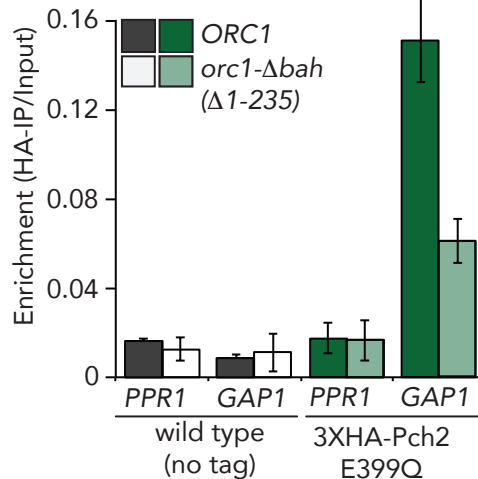

Figure 4

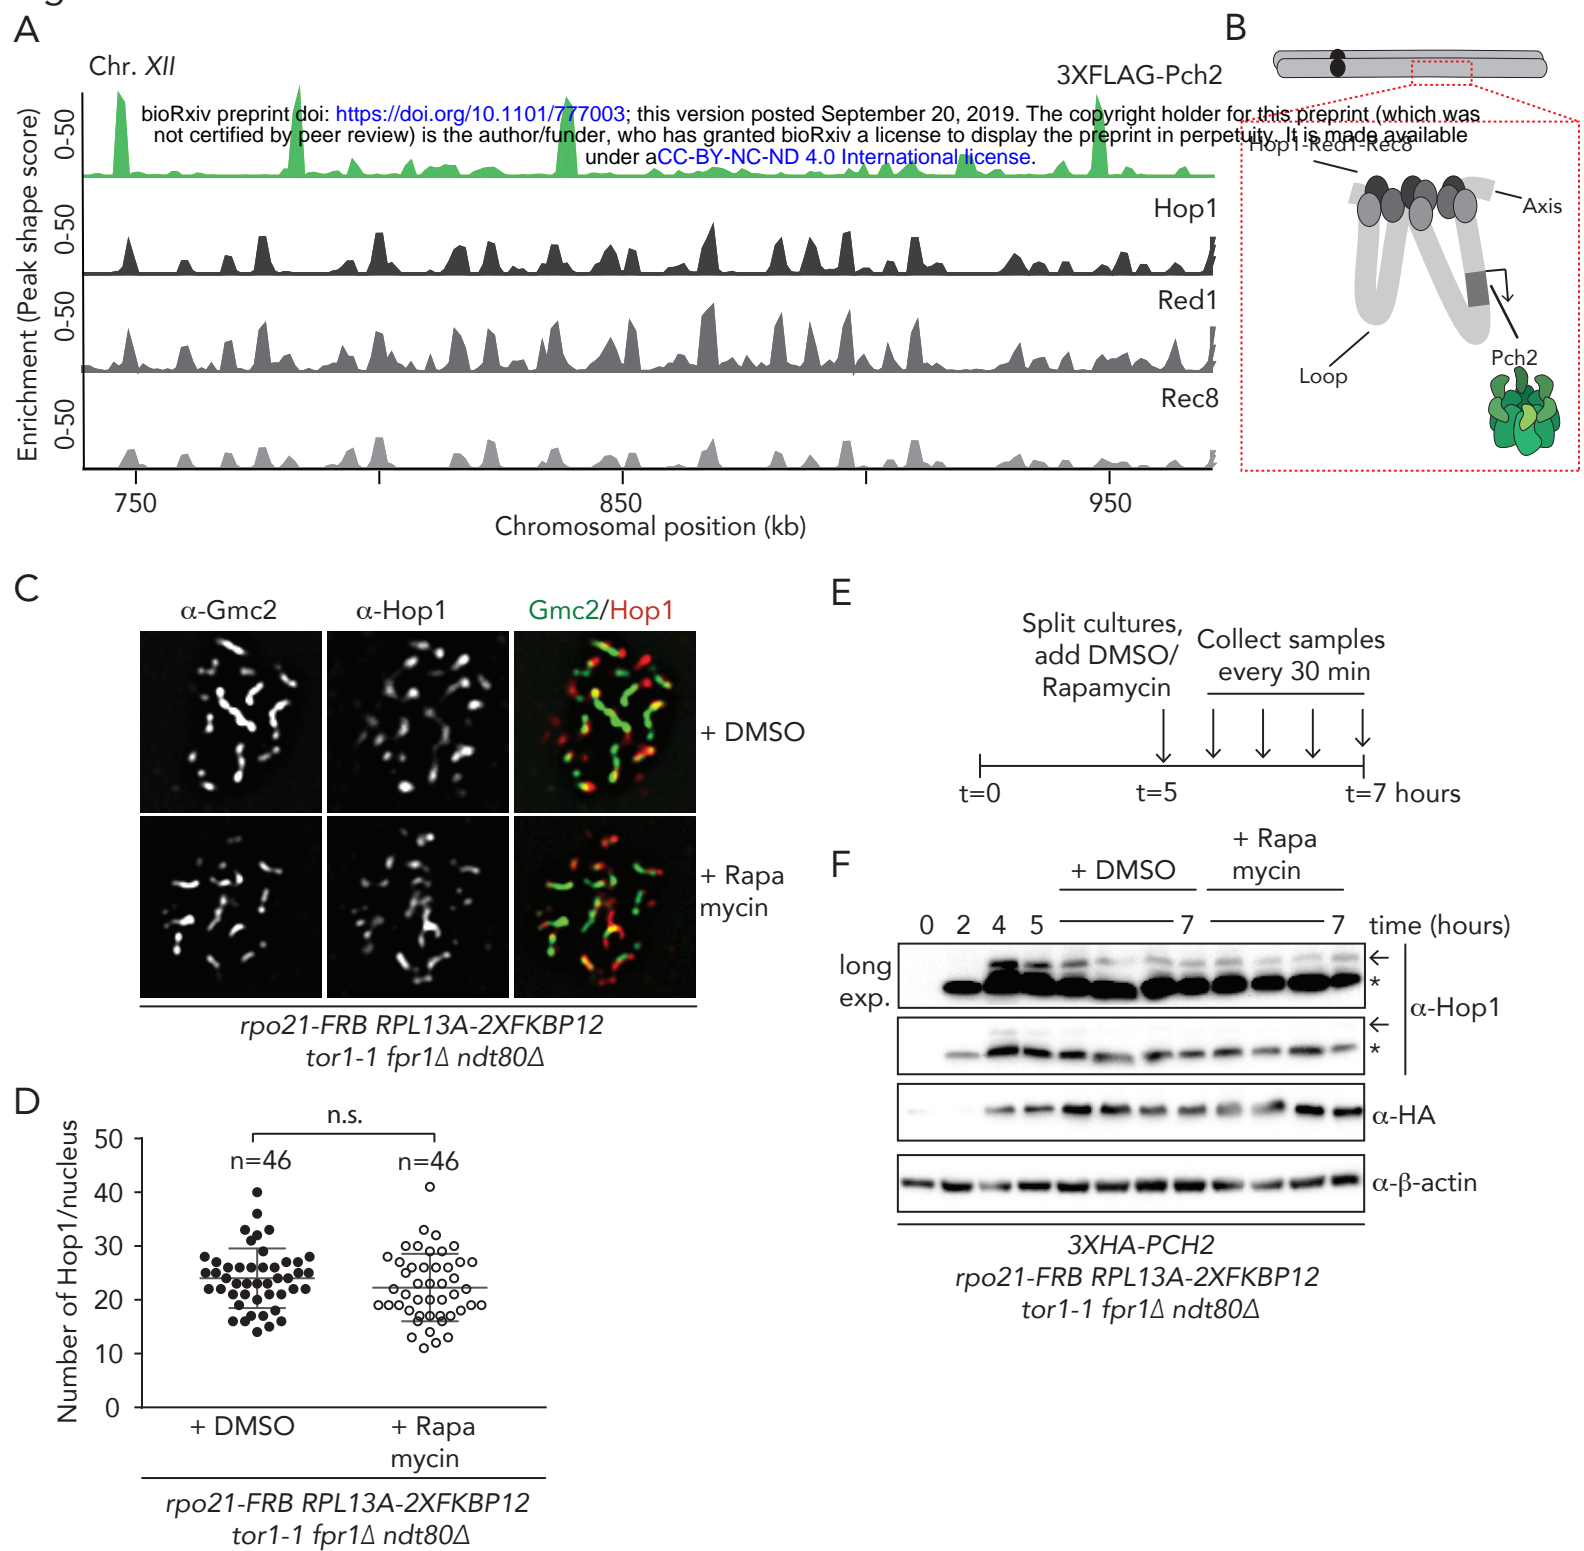

Figure 5

A

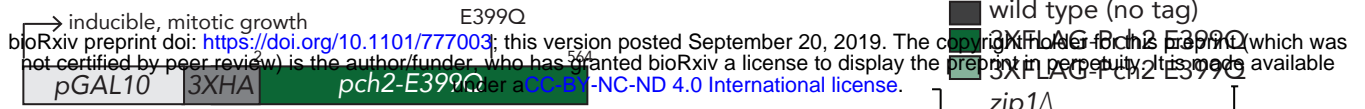

B

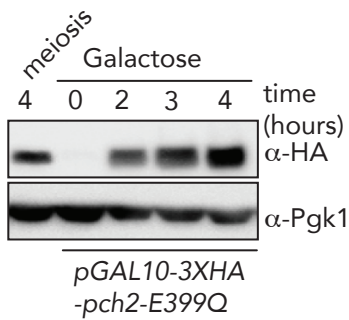

C

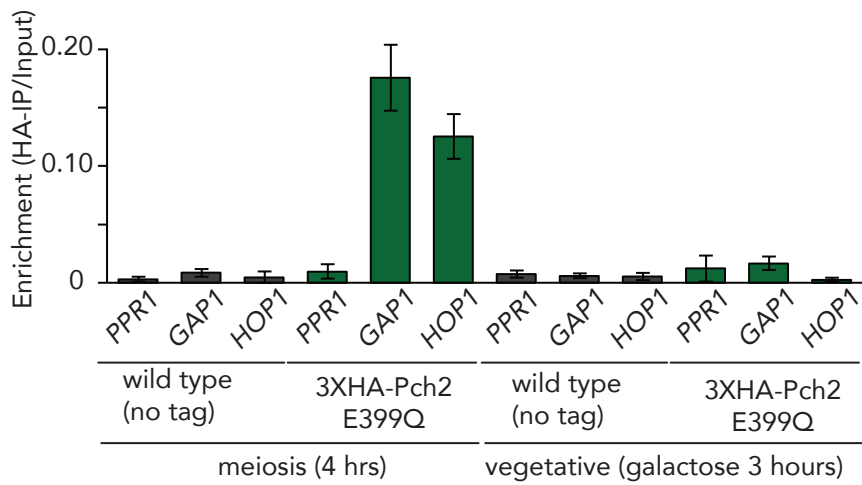

D

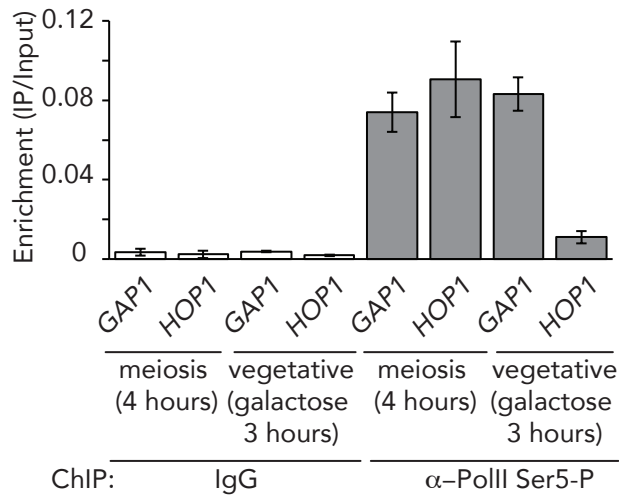

E

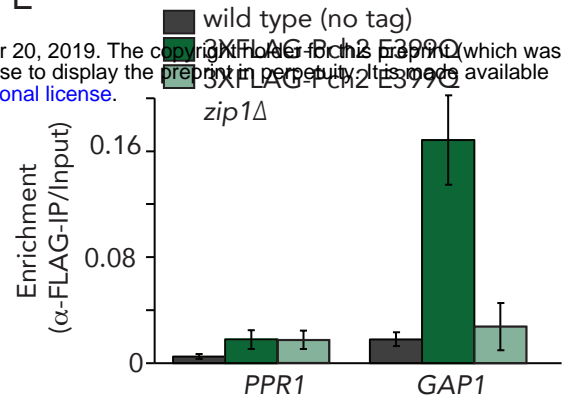

F

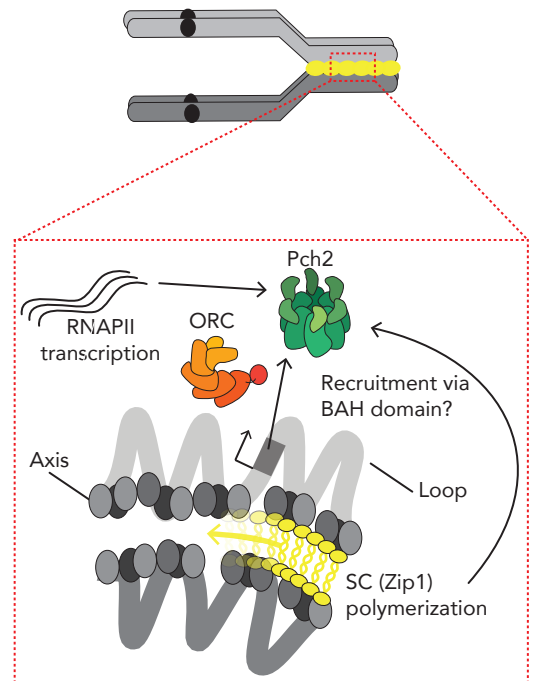

Source: https://www.biorxiv.org/content/10.1101/777003v1.full.pdf
